# Supplementary material for: Enantioselectivity in visible light-induced, singlet oxygen [2+4] cycloaddition reactions (type II photooxygenations) of 2-pyridones
Source: Royal Society of Chemistry journal article supplement (doi:10.1039/c2cc35621j), 2012-01-01

=====

ELECTRONIC SUPPLEMENTARY INFORMATION

=====

B E L O N G I N G   T O   T H E   P A P E R

Enantioselectivity in visible light-induced, singlet oxygen  
[2+4] cycloaddition reactions (type II photooxygenations) of  
2-pyridones

Christian Wiegand, Eberhardt Herdtweck and Thorsten Bach

|                                                                            |       |
|----------------------------------------------------------------------------|-------|
| 1. General Procedures .....                                                | SI-2  |
| 2. Synthesis of pyridones <b>9</b> , <b>13</b> and <b>15</b> .....         | SI-2  |
| 3. Synthesis of endoperoxides <b>4</b> and <b>5</b> .....                  | SI-5  |
| 4. Photooxygenations .....                                                 | SI-6  |
| 5. Single Crystal X-Ray Structure Determination of Compound <b>6</b> ..... | SI-12 |
| 6. HPLC traces of chiral alcohols .....                                    | SI-16 |
| 7. NMR spectra of new compounds .....                                      | SI-23 |

## 1. General Procedures

All reactions involving moisture-sensitive chemicals were carried out in flame-dried glassware with magnetic stirring under argon. TLC was performed on silica coated glass plates (silica gel 60 F<sub>254</sub>) with detection by UV (254 nm) or ceric ammonium molybdate [CAM] (0.8 g Ce(SO<sub>4</sub>)<sub>2</sub> · 4 H<sub>2</sub>O, 25 g (NH<sub>4</sub>)<sub>6</sub>Mo<sub>7</sub>O<sub>24</sub> · 4 H<sub>2</sub>O in 20 mL H<sub>2</sub>SO<sub>4</sub> and 180 mL water) with subsequent heating. Flash chromatography was performed on silica gel 60 (Merck, 230-400 mesh) with the indicated eluent. All solvents for chromatography were distilled prior to use. HPLC analyses were performed using a chiral stationary phase [ChiralPak AD-H (250 × 4.6 mm), ChiralCell OD (250 × 4.6 mm), Chiralpak AS-H (250 × 4.6 mm, 5 μm), ChiralCell OJ-H (250 × 4.6 mm), Daicel Chemical Industries] employing *n*-hexane/*i*-propanol as eluents and UV-detection at 20 °C. Semi-preparative HPLC separation was performed using a chiral stationary phase [Chiralpak AS-H (250 × 20 mm, 5 μm), Daicel Chemical Industries] employing *n*-hexane/*i*-propanol (70/30) as eluent (flow rate: 19 mL/min) and UV-detection. IR spectra were recorded on a JASCO IR-4100 (ATR), MS/HRMS measurements were performed on a Finnigan MAT 8200 (EI), a Finnigan MAT 95S (HR-EI), a Finnigan LCQ classic (ESI) and a Thermo Finnigan LTQ FT (HRMS-ESI). <sup>1</sup>H- and <sup>13</sup>C-NMR spectra were recorded at 303 K either on a Bruker AV-250, a Bruker AV-360 or a Bruker AV-500 spectrometer. The chemical shifts are reported relative to the solvent used (CHCl<sub>3</sub>, DMSO, MeOH).<sup>[1]</sup> The multiplicities of the <sup>13</sup>C-NMR signals were determined by DEPT experiments. Optical rotations were measured using a Perkin-Elmer 241 MC Polarimeter. Elemental analyses were carried out on a Elementar Vario EL in the chemistry department at the Technische Universität München. UV-Vis spectra were recorded on a Perkin-Elmer Lambda 35 UV-Vis-spectrometer. Melting points were measured on a Koffler Thermopan and are uncorrected.

## 2. Synthesis of pyridones 9, 13 and 15

### 3-Ethylpyridine-2(1*H*)-one (9)

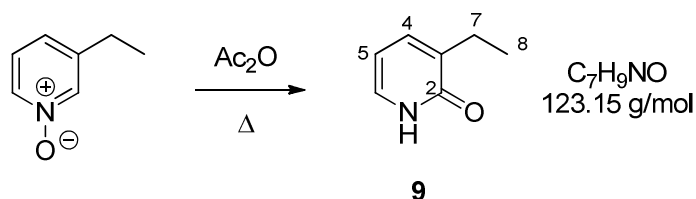

3.00 g (24.2 mmol) 3-Ethylpyridine-1-oxide<sup>[2]</sup> was heated at reflux in acetic anhydride (30 mL) for 4 h. The solvent was removed *in vacuo* and the residue was purified by flash chromatography on silica gel (eluent: EtOAc/MeOH = 1/0 → 4/1) to afford 319 mg (2.59 mmol, 11%) **9** as a white solid. Analytical

<sup>1</sup> V. Kotlyar and A. Nudelman, *J. Org. Chem.*, 1997, **62**, 7512-7515.

<sup>2</sup> D. H. Bremner, K. R. Sturrock, G. Wishart, S. R. Mitchell, S. M. Nicoll and G. Jones, *Synth. Commun.*, 1997, **27**, 1535-1542.

data for **9**:  $R_f$  = 0.16 (EtOAc) [UV];  $^1\text{H-NMR}$  (360 MHz,  $\text{CDCl}_3$ ):  $\delta$  (ppm) = 1.20 (t,  $^3J$  = 7.5 Hz, 3 H,  $\text{CH}_3$ ), 2.57 (q,  $^3J$  = 7.5 Hz, 2 H,  $\text{CH}_2$ ), 6.23 (*virt.* t,  $^3J \approx ^3J \approx 6.6$  Hz, 1 H, H-5), 7.29 (d,  $^3J$  = 6.6 Hz, 2 H, H-4, H-6), 13.29 (s, 1 H, H-1);  $^{13}\text{C-NMR}$  (91 MHz,  $\text{CDCl}_3$ ):  $\delta$  (ppm) = 12.6 (q, C-8), 23.1 (t, C-7), 106.7 (d, C-5), 131.8 (d, C-4), 134.7 (s, C-3), 137.0 (d, C-6), 165.2 (s, C-2); GC-MS (EI, 70 eV):  $m/z$  (%) = 123 (100) [ $\text{M}^+$ ], 108 (88), 104 (22), 95 (17), 80 (42), 53 (23).

The spectroscopic data are in accordance with the literature.<sup>[3]</sup>

### 3-(Ethoxymethyl)pyridine-1-oxide

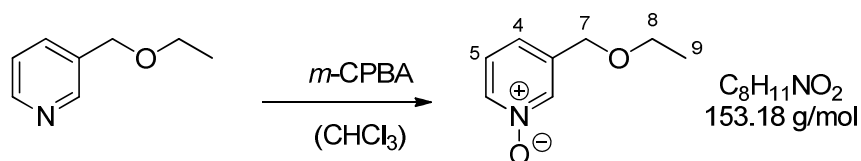

4.17 g (30.4 mmol, 1.0 eq.) 3-Ethoxymethylpyridine<sup>[4]</sup> and 8.25 g (70%, 33.4 mmol, 1.1 eq.) *m*-CPBA in 30 mL chloroform were stirred for 1 d at ambient temperature. The solvent was removed *in vacuo* and the residue was purified by flash chromatography on silica gel (eluent: EtOAc/MeOH = 1/0  $\rightarrow$  4/1) to afford 4.45 g (29.1 mmol, 96%) 3-[(ethyloxy)methyl]pyridine-1-oxide as a yellow oil. Analytical data:  $R_f$  = 0.25 (EtOAc/MeOH = 9/1) [UV]; IR (ATR):  $\tilde{\nu}$  ( $\text{cm}^{-1}$ ) = 3389 (br), 1605 (m, C=N), 1484 (m), 1440 (s, N=C), 1295 (m, C-O, N-O), 1266 (s, C-O), 1155 (s), 1105 (s), 1013 (m), 800 (m), 757 (m);  $^1\text{H-NMR}$  (360 MHz,  $\text{CDCl}_3$ ):  $\delta$  (ppm) = 1.24 (t,  $^3J$  = 7.0 Hz, 3 H, H-9), 3.56 (q,  $^3J$  = 7.0 Hz, 2 H, H-8), 4.46 (s, 2 H, H-7), 7.22-7.24 (m, 2 H, H-4, H-5), 8.10-8.13 (m, 1 H, H-6), 8.21-8.25 (m, 1 H, H-2);  $^{13}\text{C-NMR}$  (90 MHz,  $\text{CDCl}_3$ ):  $\delta$  (ppm) = 15.0 (q, C-9), 66.5 (t, C-7/8), 68.8 (t, C-7/8), 124.7 (d, C-4), 125.6 (d, C-5), 138.0 (s, C-3), 138.0 (d, C-6), 138.4 (d, C-2); MS (EI, 70 eV)  $m/z$  (%) = 153 (45) [ $\text{M}^+$ ], 137 (22) [( $\text{M}-\text{O}$ ) $^+$ ], 109 (100) [( $\text{M}-\text{C}_2\text{H}_4\text{O}$ ) $^+$ ], 92 (100) [( $\text{M}-\text{C}_2\text{H}_5\text{O}_2$ ) $^+$ ], 80 (38), 65 (33), 44 (48); HRMS (EI): calcd. for  $\text{C}_8\text{H}_{11}\text{NO}_2$  [ $\text{M}^+$ ]: 153.07898, found: 153.07892.

### 3-(Ethoxymethyl)pyridine-2(1H)-one (**13**)

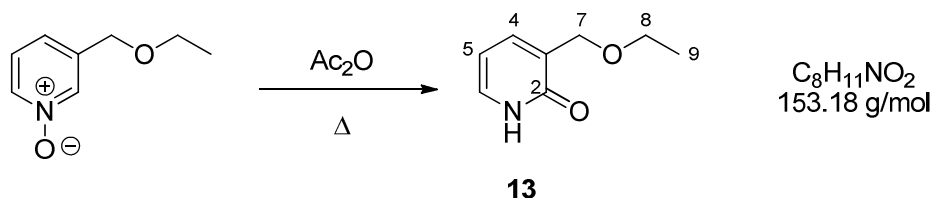

4.44 g (29.0 mmol) 3-[(Ethyloxy)methyl]pyridine-1-oxide was heated at reflux in 50 mL acetic anhydride for 4 h. After cooling to ambient temperature, the solvent was removed *in vacuo* and the residue was purified by flash chromatography on silica gel (eluent: EtOAc/MeOH = 1:0  $\rightarrow$  4/1) to afford 520 mg (3.39 mmol, 12%) **13** as a colourless solid. Analytical data for **13**:  $R_f$  = 0.19 (EtOAc) [UV, CAM]; m.p.:

<sup>3</sup> S. Yamaguchi, E. Hamade, H. Yokoyama, Y. Hirai and S. Shiotani, *J. Heterocyclic Chem.*, 2002, **39**, 335-339.

78 °C; IR (ATR):  $\tilde{\nu}$  (cm<sup>-1</sup>) = 2857 (m), 2800 (m), 1643 (s, C=O), 1614 (s), 1567 (s), 1483 (m), 1327 (m), 1227 (m, C-O), 1113 (s), 1089 (s), 769 (s); <sup>1</sup>H-NMR (360 MHz, CDCl<sub>3</sub>):  $\delta$  (ppm) = 1.27 (t, <sup>3</sup>J = 6.8 Hz, 3 H, H-9), 3.63 (q, <sup>3</sup>J = 6.8 Hz, 2 H, H-8), 4.47 (s, 2 H, H-7), 6.32 (*virt.* t, <sup>3</sup>J  $\approx$  <sup>3</sup>J  $\approx$  6.5 Hz, 1 H, H-5), 7.34 (dd, <sup>3</sup>J = 6.5 Hz, <sup>4</sup>J = 1.8 Hz, 1 H, H-6), 7.57-7.60 (m, 1 H, H-4), 13.27 (s, 1 H, H-1); <sup>13</sup>C-NMR (91 MHz, CDCl<sub>3</sub>):  $\delta$  (ppm) = 15.2 (q, C-9), 66.4 (t, C-8), 67.1 (t, C-7), 106.8 (d, C-5), 129.6 (s, C-3), 132.9 (d, C-6), 137.7 (d, C-4), 163.9 (s, C-2); MS (EI, 70 eV) *m/z* (%) = 153 (30) [M<sup>+</sup>], 139 (1), 124 (60), 109 (100), 96 (10), 80 (30), 53 (24), 43 (15); HRMS (EI): calcd. for C<sub>8</sub>H<sub>11</sub>NO<sub>2</sub> [M<sup>+</sup>]: 153.0789, found: 153.0789.

### 3-[(Benzyloxy)methyl]pyridine-1-oxide

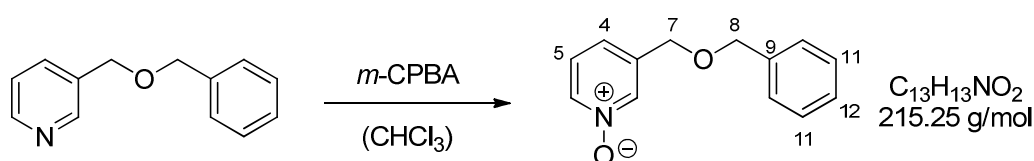

1.42 g (7.14 mmol, 1.0 eq.) 3-(Benzyloxymethyl)-pyridine<sup>[5]</sup> and 1.36 g (70%, 7.86 mmol, 1.1 eq.) *m*-CPBA in 25 mL chloroform were stirred overnight at ambient temperature. The solvent was removed *in vacuo* and the residue was purified by flash chromatography on silica gel (eluent: EtOAc/MeOH = 4/1) to afford 1.45 g (6.74 mmol, 94%) 3-[(benzyloxy)methyl]pyridine-1-oxide as a yellow-brownish oil. Analytical data: *R*<sub>f</sub> = 0.20 (EtOAc/MeOH = 9/1) [UV, CAM]; IR (ATR):  $\tilde{\nu}$  (cm<sup>-1</sup>) = 2861 (w), 1707 (w), 1605 (w), 1495 (m), 1437 (s), 1364 (m), 1270 (br, C-O, N-O), 1153 (s), 1073 (br), 1014 (s), 738 (br); <sup>1</sup>H-NMR (500 MHz, CDCl<sub>3</sub>):  $\delta$  (ppm) = 4.48 (s, 2 H, H-7), 4.57 (s, 2 H, H-8), 7.20-7.23 (m, 2 H, H-4, H-5), 7.28-7.37 (m, 5 H, H-10, H-11, H-12), 8.12 (m, 1 H, H-6), 8.24 (s, 1 H, H-2); <sup>13</sup>C-NMR (90 MHz, CDCl<sub>3</sub>):  $\delta$  (ppm) = 68.1 (t, C-7), 72.8 (t, C-8), 124.8 (d, C-4), 125.6 (d, C-5), 127.7 (d, C-11), 128.0 (d, C-12), 128.5 (d, C-10), 137.0 (s, C-9), 138.0 (C-Py), 138.0 (C-Py), 138.1 (C-Py); MS (EI, 70 eV) *m/z* (%) = 215 (10) [M<sup>+</sup>], 198 (1), 156 (5), 139 (5), 109 (100), 91 (43), 65 (17); HRMS (EI): calcd. for C<sub>13</sub>H<sub>13</sub>NO<sub>2</sub> [M<sup>+</sup>]: 215.0946, found: 215.0946.

### 3-[(Benzyloxy)methyl]pyridine-2(1*H*)-one (**15**)

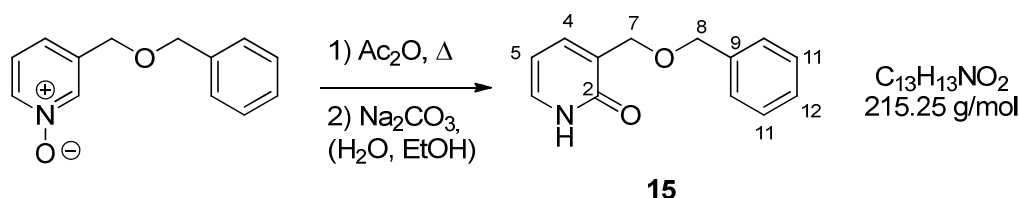

<sup>4</sup> L. Ford, J. R. Harjani, F. Atefi, M. T. Garcia, R. D. Singer and P. J. Scammells, *Green Chem.*, 2010, **12**, 1783-1789.

<sup>5</sup> E. Abele, R. Abele, A. Gaukhman and E. Lukevics, *Chem. Heterocyclic Comp.*, (New York, NY, United States) 1998, **34**, 40-43.

1.43 g (6.64 mmol) 3-[(Benzyloxy)methyl]pyridine-1-oxide was heated at reflux in 50 mL acetic anhydride for 3 h. After cooling to ambient temperature, the solvent was removed *in vacuo* and the residue was purified by flash chromatography on silica gel (eluent: EtOAc/MeOH = 4/1) to afford a mixture of product **15** and *N*-acetylated product. The mixture was stirred overnight at ambient temperature with 581 mg (5.48 mmol) Na<sub>2</sub>CO<sub>3</sub> in 10 mL water and 10 mL ethanol. The solvent was again removed and the residue was purified by flash chromatography on silica gel (eluent: EtOAc/MeOH = 4/1) to afford 476 mg (2.21 mmol, 33%) of **15** as colourless crystals. Analytical data for **15**: *R*<sub>f</sub> = 0.30 (EtOAc) [UV, CAM]; m.p.: 106 °C; IR (ATR):  $\tilde{\nu}$  (cm<sup>-1</sup>) = 2789 (br), 1650 (br, C=O), 1621 (s), 1567 (s), 1477 (m), 1115 (s), 1079 (s), 890 (s), 773 (s), 752 (s), 699 (s); <sup>1</sup>H-NMR (500 MHz, CDCl<sub>3</sub>):  $\delta$  (ppm) = 4.55 (s, 2 H, H-7), 4.67 (s, 2 H, H-8), 6.32 (*virt. t*, <sup>3</sup>*J*  $\approx$  <sup>3</sup>*J*  $\approx$  6.5 Hz, 1 H, H-5), 7.29 (*virt. t*, <sup>3</sup>*J*  $\approx$  <sup>3</sup>*J*  $\approx$  7.2 Hz, 1 H, H-12), 7.34-7.40 (m, 5 H, H-10, H-11, H-6), 7.64 (d, <sup>3</sup>*J* = 6.9 Hz, 1 H, H-4), 12.97 (s, 1 H, NH); <sup>13</sup>C-NMR (90 MHz, CDCl<sub>3</sub>):  $\delta$  (ppm) = 66.9 (t, C-7), 72.9 (t, C-8), 106.8 (d, C-5), 127.6 (d, C-12), 127.7 (d, C-10), 128.4 (d, C-11), 129.4 (s, C-3), 133.0 (d, C-6), 137.8 (d, C-4), 138.1 (s, C-9), 163.9 (s, C-2); MS (EI, 70 eV) *m/z* (%) = 215 (2) [M<sup>+</sup>], 196 (5), 124 (28), 109 (100), 91 (54), 80 (15), 65 (10), 53 (10), 39 (8); HRMS (EI): calcd. for C<sub>13</sub>H<sub>13</sub>NO<sub>2</sub> [M<sup>+</sup>]: 215.0946, found: 215.0946.

### 3. Synthesis of endoperoxides **4** and **5**

2,3-Dioxa-5-azabicyclo[2.2.2]oct-7-en-6-one (*rac*-**4**)

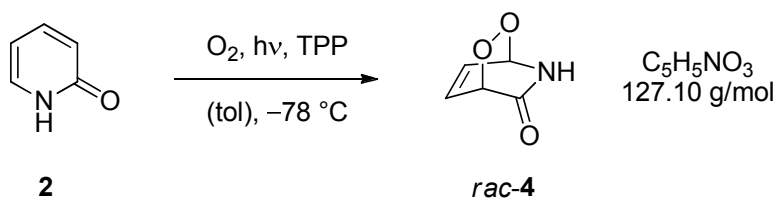

In a dry flask pre-degassed with argon, a 136 mM solution of **2** (200 mg, 2.1 mmol) in dry toluene (15.5 mL) was prepared by heating and stirring the suspension at 60 °C. Tetraphenylporphyrin was added (1.12 mg, 0.1 mol%) and the solution was saturated with oxygen. The solution was then put inside the cooling dewar at -78 °C, and after having purged the tubes of the peristaltic pump with oxygen, the irradiation of the solution was started and carried on for 6 h. Oxygen was bubbled throughout the whole reaction and dry ice was added (approximately every 20 min) in the dewar. After 2 h the same amount of tetraphenylporphyrin was added to the solution with a syringe as a solution in dry toluene. After irradiation is completed the solution contained a thin precipitate, the solvent was removed at r.t. under reduced pressure using a liquid-N<sub>2</sub> rotary evaporator. The endoperoxide **4** was obtained with a 96% conversion and was stored in the freezer. The purification was accomplished by quick column chromatography on silica gel using EtOAc as the eluent and **4** was obtained in 90% yield. Analytical data for *rac*-**4**: *R*<sub>f</sub> = 0.46 (EtOAc); <sup>1</sup>H-NMR (250 MHz, CDCl<sub>3</sub>):  $\delta$  (ppm) = 4.61 (d, <sup>3</sup>*J* = 6.0 Hz, 1 H), 5.60

(dt,  $^3J = 5.3$  Hz,  $^4J = 2.1$  Hz, 1 H), 6.47 (ddd,  $^3J = 7.9$  Hz,  $^3J = 6.0$  Hz,  $^4J = 2.0$  Hz, 1 H), 6.6 Hz (ddd,  $^3J = 7.2$  Hz,  $^3J = 5.2$  Hz,  $^4J = 1.8$  Hz, 1 H), 7.9 (br s, 1 H, NH).<sup>[6]</sup>

#### 1-Methyl-2,3-dioxa-5-azabicyclo[2.2.2]oct-7-en-6-one (*rac*-**5**)

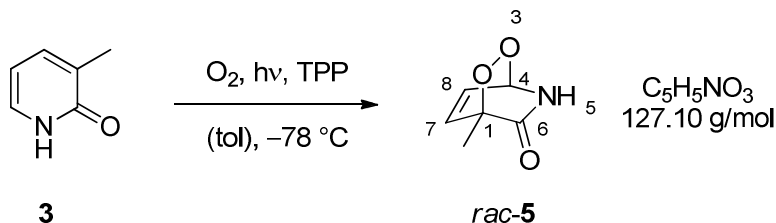

Endoperoxide *rac*-**5** was obtained by irradiation of pyridone **3** (100 mg, 916  $\mu$ mol, 1.0 eq.) with 0.56 mg (0.92  $\mu$ mol, 0.1 mol%) tetraphenylporphyrin in 6.5 mL toluene for 45 minutes under an oxygen stream at  $-75$  °C. The precipitated *rac*-**5** was filtered off and was washed with 10 mL Et<sub>2</sub>O. 126 mg (893  $\mu$ mol, 97%) of *rac*-**5** was afforded as a white-yellowish solid. Analytical data for *rac*-**5**:  $R_f = 0.67$  (EtOAc) [CAM, KMnO<sub>4</sub>]; m.p.: 109 °C (decomp.) (Et<sub>2</sub>O); IR (ATR):  $\tilde{\nu}$  (cm<sup>-1</sup>) = 3229 (vs), 3126 (m), 1719 (vs), 1692 (vs), 1437 (m), 1264 (w), 1066 (s), 1292 (w), 856 (m), 795 (w), 660 (w); <sup>1</sup>H-NMR (360 MHz, DMSO-d<sub>6</sub>):  $\delta$  (ppm) = 1.41 (s, 3 H, CH<sub>3</sub>), 5.97 (*virt.* td,  $^3J \approx ^3J \approx 5.3$  Hz,  $^4J = 1.8$  Hz, 1 H, H-4), 6.52 (dd,  $^3J = 7.8$  Hz,  $^4J = 1.8$  Hz, 1 H, H-7), 6.90 (dd,  $^3J = 7.8$  Hz,  $^3J = 5.3$  Hz, 1 H, H-8), 9.29 (s, 1 H, NH); <sup>1</sup>H-NMR (250 MHz, CDCl<sub>3</sub>):  $\delta$  (ppm) = 1.62 (s, 3 H, CH<sub>3</sub>), 5.74 (*virt.* td,  $^3J \approx ^3J \approx 5.4$  Hz,  $^4J = 1.9$  Hz, 1 H, H-4), 6.47 (dd,  $^3J = 7.9$  Hz,  $^4J = 1.9$  Hz, 1 H, H-7), 6.84 (dd,  $^3J = 7.9$  Hz,  $^3J = 5.4$  Hz, 1 H, H-8), 6.89 (s, 1 H, NH); <sup>13</sup>C-NMR (91 MHz, CDCl<sub>3</sub>):  $\delta$  (ppm) = 14.3 (q, CH<sub>3</sub>), 80.2 (d, C-4), 81.8 (s, C-1), 133.0 (d, C-7), 134.1 (d, C-8), 171.8 (s, C-6); MS (EI, 70 eV):  $m/z$  (%) = 142 (8) [(M+H)<sup>+</sup>], 126 (12) [(M-CH<sub>3</sub>)<sup>+</sup>], 114 (10), 109 (12) [(M-O<sub>2</sub>)<sup>+</sup>], 98 (15) [(M-CONH)<sup>+</sup>], 83 (78) [(M-C<sub>2</sub>H<sub>4</sub>NO)<sup>+</sup>], 71 (32), 55 (22); HRMS (ED): calcd. for C<sub>6</sub>H<sub>7</sub>NO<sub>3</sub> [(M-CH<sub>3</sub>)<sup>+</sup>]: 141.0426, found: 141.0428.<sup>[7]</sup>

## 4. Photooxygenations

(*S*)-3-Hydroxy-3-methylpyridine-2,6(1*H*,3*H*)-dione (**6**) [Representative procedure]

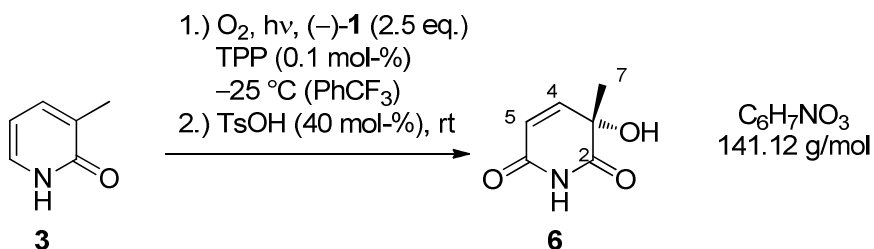

To a solution of 25.0 mg (200  $\mu$ mol, 1.0 eq.) pyridone **4** and 202 mg (573  $\mu$ mol, 2.5 eq.) (–)-template (**1**) in 2 mL trifluorotoluene was added 100  $\mu$ L (2.28 mM in PhCF<sub>3</sub>, 0.14 mg, 0.23  $\mu$ mol, 0.1 mol%)

<sup>6</sup> C Cornaggia, *Laurea thesis*, University of Pavia, **2007**.

tetraphenylporphyrin solution. Under a continuous oxygen stream the solution was cooled to  $-25\text{ }^{\circ}\text{C}$ . After equilibration at  $-25\text{ }^{\circ}\text{C}$  for 15 minutes, the solution was irradiated for 20 minutes with two 400 W sodium vapour lamps (*Philips* Son-T-Agro) at  $-25\text{ }^{\circ}\text{C}$ . After the first irradiation 17.4 mg (90.0  $\mu\text{mol}$ , 40 mol%) *p*-toluenesulfonic acid monohydrate was added and the reaction was warmed to room temperature. After stirring for 8–13 h at room temperature, the reaction mixture was cooled, and subjected to two further irradiation cycles as described above. After three cycles, the solvent was removed *in vacuo* and the residue was purified by flash chromatography on silica gel (eluent:  $\text{CH}_2\text{Cl}_2$ /pentane/methanol = 29/10/1  $\rightarrow$  9/0/1) to afford 29.0 mg **6** (200  $\mu\text{mol}$ , 99%, 90% *ee*) as a colourless solid. Analytical data for **6**:  $R_f$  = 0.62 (EtOAc) [CAM]; HPLC (AS-H,  $250 \times 4.6\text{ mm}$ , *n*-Hex/*i*-PrOH = 70/30, 1 mL/min):  $t_R$  = 9.1 min, 12.4 min;  $[\alpha]_D^{20}$  =  $-23.0$  ( $c$  = 0.5 in MeOH) [90% *ee*]; m.p.:  $91\text{ }^{\circ}\text{C}$ ; IR (ATR):  $\tilde{\nu}$  ( $\text{cm}^{-1}$ ) = 3448 (m, OH), 1686 (vs, C=O), 1633 (s), 1381 (w), 1279 (m, C-O), 1192 (w), 1144 (m), 1116 (m), 844 (m), 777 (m), 680 (w);  $^1\text{H}$ -NMR (250 MHz,  $\text{CDCl}_3$ ):  $\delta$  (ppm) = 1.61 (s, 3 H, H-7), 3.44 (s, 1 H, OH), 6.11 (dd,  $^3J$  = 10.2 Hz,  $^4J$  = 2.0 Hz, 1 H, H-5), 6.87 (d,  $^3J$  = 10.2 Hz, 1 H, H-4), 8.47 (s, 1 H, H-1);  $^{13}\text{C}$ -NMR (63 MHz,  $\text{CDCl}_3$ ):  $\delta$  (ppm) = 29.1 (q, C-7), 70.0 (s, C-3), 120.2 (d, C-5), 148.8 (d, C-4), 164.3 (s, C-6), 176.5 (s, C-2); MS (EI, 70 eV):  $m/z$  (%) = 126 (10)  $[(\text{M}-\text{CH}_3)^+]$ , 98 (100), 70 (20), 55 (46), 43 (35); HRMS (EI): calcd. for  $\text{C}_7\text{H}_9\text{NO}_3$   $[(\text{M}-\text{CH}_3)^+]$ : 126.0191, found: 126.0192.

The spectroscopic data are in accordance with the literature.<sup>[8]</sup>

### 3-Hydroxy-1,3-dimethylpyridine-2,6(1*H*,3*H*)-dione (**8**)

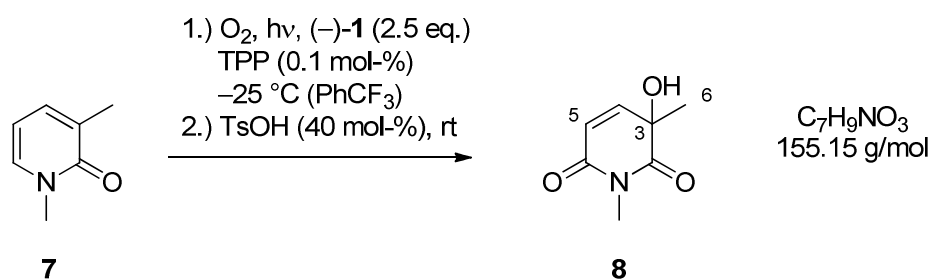

Following the representative procedure, pyridone **7**<sup>[9]</sup> (28.2 mg, 229  $\mu\text{mol}$ , 1.0 eq.) was reacted with 203 mg (576  $\mu\text{mol}$ , 2.5 eq.) (–)-template (**1**) in 2 mL trifluorotoluene and 125  $\mu\text{L}$  (1.80 mM in  $\text{PhCF}_3$ , 0.14 mg, 0.22  $\mu\text{mol}$ , 0.1 mol%) tetraphenylporphyrin solution. After the first irradiation interval, 16.0 mg (90.0  $\mu\text{mol}$ , 40 mol%) *p*-toluenesulfonic acid monohydrate was added and after purification by flash chromatography on silica gel (eluent:  $\text{CH}_2\text{Cl}_2$ /pentane/methanol = 29/15/1) 34.0 mg (219  $\mu\text{mol}$ , 96%, 0% *ee*) **8** was obtained as a colourless solid. Analytical data for **8**:  $R_f$  = 0.68 (EtOAc) [CAM]; HPLC (AD-H,  $250 \times 4.6\text{ mm}$ , *n*-Hex/*i*-PrOH = 90/10, 1 mL/min):  $t_R$  = 9.6 min, 11.6 min;  $^1\text{H}$ -NMR (250 MHz,

<sup>7</sup> M. Cakmak, Diploma thesis, TU Munich, 2007.

<sup>8</sup> E. Sato, Y. Ikeda and Y. Kanaoka, *Chem. Pharm. Bull.*, 1987, **35**, 507–513.



CDCl<sub>3</sub>):  $\delta$  (ppm) = 1.55 (s, 3 H, H-7), 3.23 (s, 3 H, NCH<sub>3</sub>), 3.48 (s, 1 H, OH), 6.14 (d,  $^3J$  = 10.1 Hz, 1 H, H-5), 6.82 (d,  $^3J$  = 10.1 Hz, 1 H, H-4); <sup>13</sup>C-NMR (63 MHz, CDCl<sub>3</sub>):  $\delta$  (ppm) = 26.4 (q, NCH<sub>3</sub>), 29.9 (q, C-7), 70.0 (s, C-3), 120.6 (d, C-5), 146.4 (d, C-4), 164.0 (s, C-6), 176.9 (s, C-2); GC-MS (EI, 70 eV,  $t_R$  = 6.81 min [STD]):  $m/z$  (%) = 165 (1) [(M+H)<sup>+</sup>], 140 (8) [(M-CH<sub>3</sub>)<sup>+</sup>], 112 (22), 98 (100), 70 (23), 55 (52). The spectroscopic data are in accordance with the literature.<sup>[8]</sup>

(S)-3-Ethyl-3-hydroxypyridine-2,6(1*H*,3*H*)-dione (**10**)

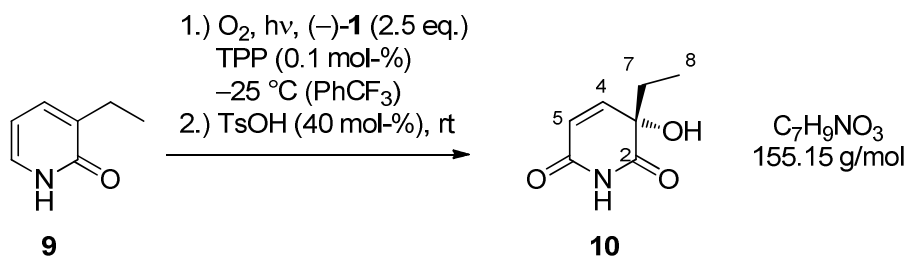

Following the representative procedure, pyridone **9**<sup>[3]</sup> (28.0 mg, 227  $\mu\text{mol}$ , 1.0 eq.) was reacted with 201 mg (570  $\mu\text{mol}$ , 2.5 eq.) (–)-template (**1**) in 2 mL trifluorotoluene and 125  $\mu\text{L}$  (1.80 mM in PhCF<sub>3</sub>, 0.14 mg, 0.22  $\mu\text{mol}$ , 0.1 mol%) tetraphenylporphyrin solution. After the first irradiation interval 16.0 mg (90.0  $\mu\text{mol}$ , 40 mol%) *p*-toluenesulfonic acid monohydrate was added and after purification by flash chromatography on silica gel (eluent: CH<sub>2</sub>Cl<sub>2</sub>/pentane/methanol = 29/15/1) 35.0 mg (226  $\mu\text{mol}$ , 99%, 86% *ee*) **10** was obtained as a colourless solid. Analytical data for **10**:  $R_f$  = 0.68 (EtOAc) [CAM]; HPLC (AS-H, 250  $\times$  4.6 mm, *n*-Hex/*i*-PrOH = 70/30, 1 mL/min):  $t_R$  = 9.5 min, 12.0 min;  $[\alpha]_D^{20}$  = –98.5 ( $c$  = 0.34 in CH<sub>2</sub>Cl<sub>2</sub>) [86% *ee*]; m.p.: 65  $^\circ\text{C}$ ; IR (ATR):  $\tilde{\nu}$  (cm<sup>–1</sup>) = 3360 (br, NH), 1712 (w, C=O), 1685 (vs, CONHCO), 1631 (s), 1436 (w), 1305 (w), 1271 (m), 1248 (m, C-O), 1183 (w), 1134 (m), 1118 (m), 837 (m); <sup>1</sup>H-NMR (360 MHz, CDCl<sub>3</sub>):  $\delta$  (ppm) = 0.91 (t,  $^3J$  = 7.6 Hz, 3 H, H-8), 1.77–2.04 (m, 2 H, H-7), 3.73 (s, 1 H, OH), 6.18 (dd,  $^3J$  = 10.1 Hz,  $^4J$  = 2.2 Hz, 1 H, H-5), 6.80 (d,  $^3J$  = 10.1 Hz, 1 H, H-4), 8.89 (s, 1 H, H-1); <sup>13</sup>C-NMR (91 MHz, CDCl<sub>3</sub>):  $\delta$  (ppm) = 7.5 (q, C-8), 35.6 (t, C-7), 73.5 (s, C-3), 121.4 (d, C-5), 147.7 (d, C-4), 164.3 (s, C-6), 176.0 (s, C-1); MS (EI, 70 eV):  $m/z$  (%) = 155 (30) [M<sup>+</sup>], 126 (98) [(M–C<sub>2</sub>H<sub>5</sub>)<sup>+</sup>], 112 (100) [(M–CONH)<sup>+</sup>], 99 (60), 82 (38), 55 (63); HRMS (EI): calcd. for C<sub>7</sub>H<sub>9</sub>NO<sub>3</sub> [M<sup>+</sup>]: 155.0582, found: 155.0579.

(S)-3-Benzyl-3-hydroxypyridine-2,6(1*H*,3*H*)-dione (**12**)

<sup>9</sup> H. L. Bradlow and C. A. Vanderwerf, *J. Org. Chem.*, 1951, **16**, 73–83.



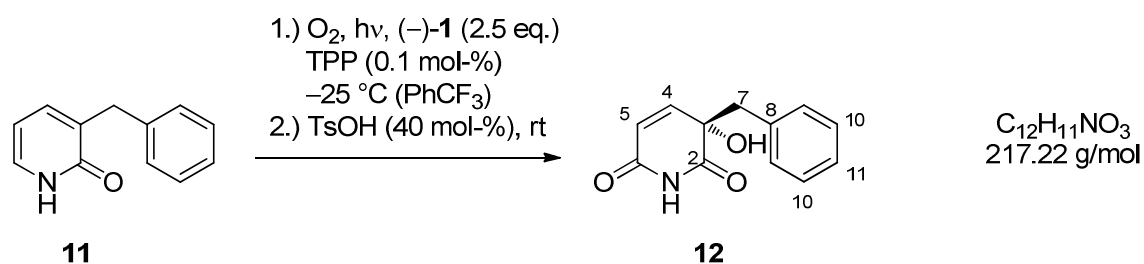

Following the representative procedure, pyridone **11**<sup>[10]</sup> (42.0 mg, 227 μmol, 1.0 eq.) was reacted with 203 mg (576 μmol, 2.5 eq.) (-)-template (**1**) in 6 mL trifluorotoluene and 125 μL (2.00 mM in PhCF<sub>3</sub>, 0.18 mg, 0.29 μmol, 0.1 mol%) tetraphenylporphyrin solution. After the first irradiation interval, 16.0 mg (90.0 μmol, 40 mol%) *p*-toluenesulfonic acid monohydrate was added and after purification by flash chromatography on silica gel (eluent: EtOAc/pentane = 3/7 → 1/0, followed by a second chromatography with CH<sub>2</sub>Cl<sub>2</sub>/pentane/methanol = 29/10/1 → 9/0/1) 36.0 mg (166 μmol, 73%, 69% *ee*) **12** was obtained as a colourless solid. Analytical data for **12**: *R*<sub>f</sub> = 0.73 (EtOAc) [CAM]; HPLC (AD-H, 250 × 4.6 mm, *n*-Hex/*i*-PrOH = 90/10, 1 mL/min): *t*<sub>R</sub> = 24.7 min, 34.6 min; [ $\alpha$ ]<sub>D</sub><sup>20</sup> = -173.0 (*c* = 0.06 in CH<sub>2</sub>Cl<sub>2</sub>) [69% *ee*]; m.p.: 125-138 °C; IR (ATR):  $\tilde{\nu}$  (cm<sup>-1</sup>) = 3434 (m, NH), 3092 (m), 1719 (m, C=O), 1681 (vs, CONHCO), 1632 (s), 1387 (w), 1258 (s, C-O), 1153 (m), 1113 (m), 863 (w), 700 (w); <sup>1</sup>H-NMR (360 MHz, CDCl<sub>3</sub>):  $\delta$  (ppm) = 3.08 (d, <sup>2</sup>*J* = 13.2 Hz, 1 H, H-7), 3.17 (d, <sup>2</sup>*J* = 13.2 Hz, 1 H, H-7), 3.64 (s, 1 H, OH), 6.09 (dd, <sup>3</sup>*J* = 10.3 Hz, <sup>4</sup>*J* = 2.2 Hz, 1 H, H-5), 6.75 (d, <sup>3</sup>*J* = 10.3 Hz, 1 H, H-4), 7.09-7.13 (m, 2 H, H-9), 7.26-7.29 (m, 3 H, H-10, H-11), 8.37 (s, 1 H, H-1); <sup>13</sup>C-NMR (90 MHz, CDCl<sub>3</sub>):  $\delta$  (ppm) = 48.8 (t, C-7), 73.7 (s, C-3), 121.4 (d, C-5), 127.8 (d, C-11), 128.4 (d, C-10), 130.3 (d, C-9), 132.5 (s, C-8), 147.0 (d, C-4), 163.8 (s, C-6), 175.4 (s, C-2); MS (EI, 70 eV): *m/z* (%) = 214 (2) [M<sup>+</sup>], 198 (1), 171 (1), 157 (1), 145 (1), 91 (100), 65 (10), 39 (3); HRMS (EI): calcd. for C<sub>12</sub>H<sub>11</sub>NO<sub>3</sub> [M<sup>+</sup>]: 217.0739, found: 217.0740.

(*R*)-3-(Ethoxymethyl)-3-hydroxypyridine-2,6(1*H*,3*H*)-dione (**14**)

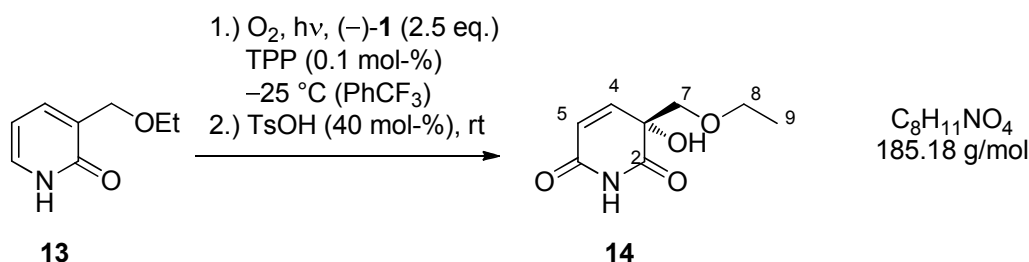

Following the representative procedure, pyridone **13** (25.0 mg, 163 μmol, 1.0 eq.) was reacted with 144 mg (408 μmol, 2.5 eq.) (-)-template (**1**) in 5 mL trifluorotoluene and 100 μL (3.3 mM in PhCF<sub>3</sub>, 0.20 mg, 0.33 μmol, 0.1 mol%) tetraphenylporphyrin solution. After the first irradiation interval, 11.2 mg (65.0 μmol, 40 mol%) *p*-toluenesulfonic acid monohydrate was added and after purification by flash

<sup>10</sup> L. I. Kruse, C. Kaiser, W. E. DeWolf, J. A. Finkelstein, J. S. Frazee, E. L. Hilbert, S. T. Ross, K. E. Flaim and J. L. Sawyer, *J. Med. Chem.*, 1990, **33**, 781-789.

chromatography on silica gel (eluent: CH<sub>2</sub>Cl<sub>2</sub>/pentane/methanol = 29/10/1) 9.0 mg (49.0 μmol, 30%, 79% *ee*) **14** was obtained as colourless crystals. Analytical data for **14**: *R*<sub>f</sub> = 0.74 (EtOAc) [CAM]; HPLC (OD, 250 × 4.6 mm, *n*-Hex/*i*-PrOH = 90/10, 1 mL/min): *t*<sub>R</sub> = 21.4 min, 23.4 min; [ $\alpha$ ]<sub>D</sub><sup>20</sup> = −138.3 (*c* = 4.1 in CH<sub>2</sub>Cl<sub>2</sub>) [79% *ee*]; m.p.: 105 °C; IR (ATR):  $\tilde{\nu}$  (cm<sup>−1</sup>) = 3458 (m, NH), 3414 (m), 1687 (br, C=O), 1633 (s, CONHCO), 1378 (m), 1264 (s), 1184 (w), 1119 (s), 1100 (m), 849 (m), 685 (w); <sup>1</sup>H-NMR (360 MHz, CDCl<sub>3</sub>):  $\delta$  (ppm) = 1.12 (t, <sup>3</sup>*J* = 7.2 Hz, 3 H, H-9), 3.49 (q, <sup>3</sup>*J* = 7.2 Hz, 2 H, H-8), 3.52 (d, <sup>2</sup>*J* = 9.2 Hz, 1 H, H-7), 3.63 (d, <sup>2</sup>*J* = 9.2 Hz, 1 H, H-7), 6.22 (dd, <sup>3</sup>*J* = 10.1 Hz, <sup>4</sup>*J* = 1.8 Hz, 1 H, H-5), 6.78 (d, <sup>3</sup>*J* = 10.1 Hz, 1 H, H-4), 8.41 (s, 1 H, NH); <sup>13</sup>C-NMR (90 MHz, CDCl<sub>3</sub>):  $\delta$  (ppm) = 14.8 (q, C-9), 67.7 (t, C-8), 72.7 (s, C-3), 76.0 (t, C-7), 123.0 (d, C-5), 145.2 (d, C-4), 164.1 (s, C-6), 174.5 (s, C-2); MS (EI, 70 eV) *m/z* (%) = 185 (1) [M<sup>+</sup>], 168 (3) [(M−OH)<sup>+</sup>], 127 (20), 91 (17), 82 (33), 61 (25), 59 (100), 45 (28), 43 (89); HRMS (EI): calcd. for C<sub>8</sub>H<sub>10</sub>NO<sub>3</sub> [(M−OH)<sup>+</sup>]: 168.0655, found: 168.0655.

(*R*)-3-[(Benzyloxy)methyl]-3-hydroxypyridine-2,6(1*H*,3*H*)-dione (**16**)

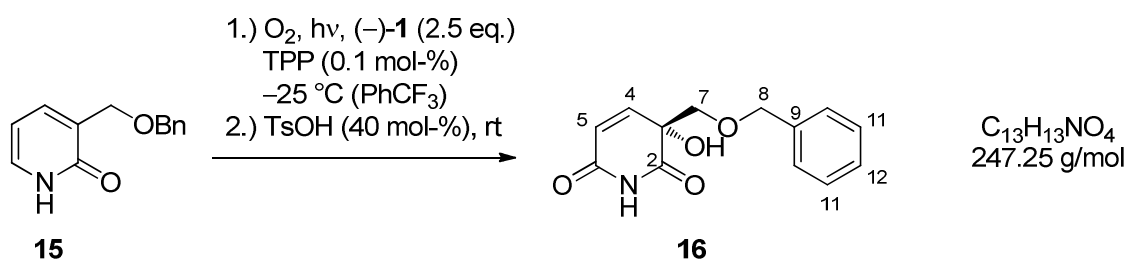

Following the representative procedure, pyridone **15** (25.0 mg, 116 μmol, 1.0 eq.) was reacted with 102 mg (290 μmol, 2.5 eq.) (−)-template (**1**) in 5 mL trifluorotoluene and 100 μL (1.16 mM in PhCF<sub>3</sub>, 71.0 μg, 0.12 μmol, 0.1 mol%) tetraphenylporphyrin solution. After the first irradiation interval, 8.0 mg (64.0 μmol, 40 mol%) *p*-toluenesulfonic acid monohydrate was added and after purification by flash chromatography on silica gel (eluent: EtOAc/pentane = 7/3 → 1/1 → 1/0) 11.0 mg (45.0 μmol, 38%, 85% *ee*) **16** was obtained as a yellow-brownish solid. Analytical data for **16**: *R*<sub>f</sub> = 0.77 (EtOAc) [CAM]; HPLC (OD-H, 250 × 4.6 mm, *n*-Hex/*i*-PrOH = 80/20, 1 mL/min): *t*<sub>R</sub> = 12.2 min, 14.8 min; [ $\alpha$ ]<sub>D</sub><sup>20</sup> = −120.0 (*c* = 5.3 in CH<sub>2</sub>Cl<sub>2</sub>) [85% *ee*]; m.p.: 82 °C; IR (ATR):  $\tilde{\nu}$  (cm<sup>−1</sup>) = 3380 (w, NH), 1693 (br, C=O), 1637 (s, CONHCO), 1366 (m), 1289 (m, C−O), 1183 (m), 1128 (m), 1081 (m), 849 (m), 745 (m), 695 (m); <sup>1</sup>H-NMR (360 MHz, CDCl<sub>3</sub>):  $\delta$  (ppm) = 3.46 (d, <sup>2</sup>*J* = 8.8 Hz, 1 H, H-7), 3.60 (d, <sup>2</sup>*J* = 8.8 Hz, 1 H, H-7), 4.43 (s, 2 H, H-8), 6.15 (dd, <sup>3</sup>*J* = 10.1 Hz, <sup>4</sup>*J* = 1.8 Hz, 1 H, H-5), 6.69 (d, <sup>3</sup>*J* = 10.1 Hz, 1 H, H-4), 7.12–7.30 (m, 5 H, H-10, H-11, H-12), 8.54 (s, 1 H, NH); <sup>13</sup>C-NMR (90 MHz, CDCl<sub>3</sub>):  $\delta$  (ppm) = 72.5 (s, C-3), 73.7 (t, C-8), 75.2 (t, C-7), 123.1 (d, C-5), 127.5 (d, 2 C, C-10), 128.0 (d, C-12), 128.5 (d, 2 C, C-11), 136.8 (s, C-9), 145.2 (d, C-4), 164.1 (s, C-6), 174.5 (s, C-2); MS (EI, 70 eV) *m/z* (%) = 247 (1) [M<sup>+</sup>], 217 (5) [(M−CH<sub>2</sub>O)<sup>+</sup>], 181 (8), 152 (8), 139 (9), 125 (55), 110 (77), 92 (55), 91 (100), 89 (17); HRMS (EI): calcd. for C<sub>12</sub>H<sub>11</sub>NO<sub>3</sub> [(M−CH<sub>2</sub>O)<sup>+</sup>]: 217.0733, found: 217.0730.

(*S*)-8a-Hydroxy-6,7,8,8a-tetrahydroisoquinoline-1,3(2*H*,5*H*)-dione (**18**)

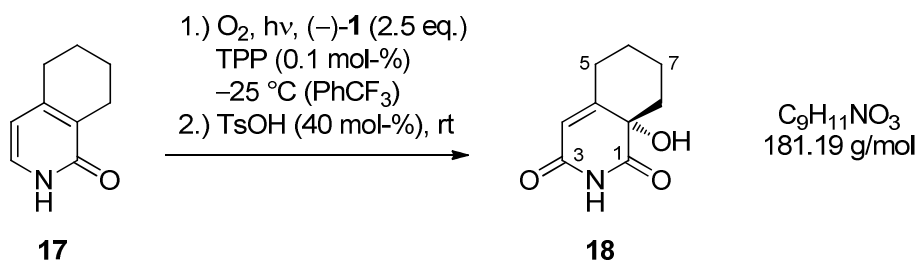

Following the representative procedure, tetrahydroisoquinolone<sup>[11]</sup> **17** (25.0 mg, 168 μmol, 1.0 eq.) was reacted with 148 mg (419 μmol, 2.5 eq.) (–)-template (**1**) in 5 mL trifluorotoluene and 100 μL (1.68 mM in PhCF<sub>3</sub>, 0.10 mg, 0.17 μmol, 0.1 mol%) tetraphenylporphyrin solution. After the first irradiation interval, 12.0 mg (67.0 μmol, 40 mol%) *p*-toluenesulfonic acid monohydrate was added and after purification by flash chromatography on silica gel (eluent: EtOAc/pentane = 3/7 → 1/0, followed by a second chromatography with CH<sub>2</sub>Cl<sub>2</sub>/pentane/methanol = 29/15/1) 14.0 mg (77.0 μmol, 46%, 71% *ee*) **18** was obtained as a colourless solid. Analytical data for **18**: *R*<sub>f</sub> = 0.74 (EtOAc) [CAM]; HPLC (OJ-H, 250 × 4.6 mm, *n*-Hex/*i*-PrOH = 70/30, 1 mL/min): *t*<sub>R</sub> = 10.3 min, 15.8 min; [*α*]<sub>D</sub><sup>20</sup> = –82.2 (*c* = 0.45 in CH<sub>2</sub>Cl<sub>2</sub>) [68% *ee*]; m.p.: 137 °C; IR (ATR):  $\tilde{\nu}$  (cm<sup>–1</sup>) = 3460 (w, NH), 2938 (w, C<sub>al</sub>), 1694 (s, C=O), 1640 (m, CONHCO), 1428 (w), 1389 (w), 1292 (m), 1263 (m, C–O), 1106 (w), 999 (w), 848 (w); <sup>1</sup>H-NMR (500 MHz, CDCl<sub>3</sub>): δ (ppm) = 1.45 (*virt.* qt, <sup>2</sup>*J* ≈ <sup>3</sup>*J* ≈ <sup>3</sup>*J* ≈ 13.2 Hz, <sup>3</sup>*J* ≈ <sup>3</sup>*J* ≈ 3.9 Hz, 1 H, C-6*HH*), 1.60 (*virt.* td, <sup>2</sup>*J* ≈ <sup>3</sup>*J* ≈ 13.5 Hz, <sup>3</sup>*J* = 4.4 Hz, 1 H, C-8*HH*), 1.68–1.72 (m, 1 H, C-7*HH*), 2.02–2.09 (m, 2 H, C-6*HH*, C-7*HH*), 2.21–2.25 (m, 1 H, C-8*HH*), 2.34–2.37 (m, 1 H, C-5*HH*), 2.74 (*virt.* tdd, <sup>2</sup>*J* ≈ <sup>3</sup>*J* ≈ 13.1 Hz, <sup>3</sup>*J* = 5.0 Hz, <sup>4</sup>*J* = 1.4 Hz, 1 H, C-5*HH*), 3.70 (s, 1 H, OH), 5.92 (d, <sup>4</sup>*J* = 1.4 Hz, 1 H, H-4), 8.96 (s, 1 H, NH); <sup>13</sup>C-NMR (90 MHz, CDCl<sub>3</sub>): δ (ppm) = 20.3 (t, C-7), 29.2 (t, C-6), 31.4 (t, C-5), 40.2 (t, C-8), 70.8 (s, C-8a), 114.8 (d, C-4), 163.0 (s, C-4a), 164.2 (s, C-3), 177.0 (s, C-1); MS (EI, 70 eV): *m/z* (%) = 181 (50) [*M*<sup>+</sup>], 138 (75) [(*M*–CONH)<sup>+</sup>], 125 (30), 115 (23), 109 (20), 67 (32), 53 (26), 39 (100); HRMS (EI): calcd. for C<sub>9</sub>H<sub>11</sub>NO<sub>3</sub> [*M*<sup>+</sup>]: 181.0739, found: 181.0737.

<sup>11</sup> E. Ochiai and Y. Kawazoe, *Pharm. Soc. Japan*, 1957, **5**, 606–610.

## 5. Single Crystal X-Ray Structure Determination of Compound 6

### General:

The data were collected on an X-ray single crystal diffractometer equipped with a CCD detector (APEX II,  $\kappa$ -CCD), a rotating anode (Bruker AXS, FR591) with  $\text{CuK}\alpha$  radiation ( $\lambda = 1.54180 \text{ \AA}$ ), and a graphite monochromator by using the SMART software package. [1] The measurement was performed on a single crystal coated with perfluorinated ether. The crystal was fixed on the top of a glass fiber and transferred to the diffractometer and was frozen under a stream of cold nitrogen. A matrix scan using three short runs was used to determine the initial lattice parameters. Reflections were merged and corrected for Lorentz and polarization effects, scan speed, and background using SAINT. [2] Absorption corrections, including odd and even ordered spherical harmonics were performed using SADABS. [2] Space group assignments were based upon systematic absences,  $E$  statistics, and successful refinement of the structures. Structures were solved by direct methods with the aid of successive difference Fourier maps, and were refined against all data using WinGX [7] based on SIR-92. [3] Hydrogen atoms could be located in the difference Fourier maps and were allowed to refine freely. If not mentioned otherwise, non-hydrogen atoms were refined with anisotropic displacement parameters. Full-matrix least-squares refinements were carried out by minimizing  $\sum w(F_o^2 - F_c^2)^2$  with SHELXL-97 [5] weighting scheme. Neutral atom scattering factors for all atoms and anomalous dispersion corrections for the non-hydrogen atoms were taken from *International Tables for Crystallography*. [4] Images of the crystal structures were generated by PLATON [6].

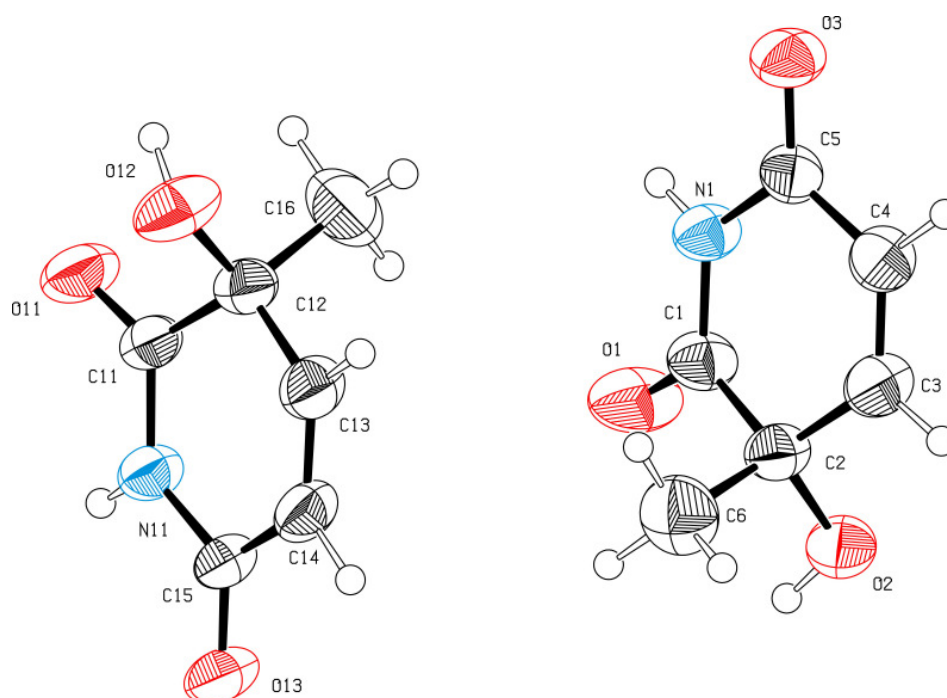

**Figure F2** – Ortep drawing of compound **6** with 50% ellipsoids. [6] The asymmetric unit contains two crystallographical independent molecules **A** (right) and **B** (left).

|                        |                                                                                                                                                                                                                                                                                                                                                                                        |
|------------------------|----------------------------------------------------------------------------------------------------------------------------------------------------------------------------------------------------------------------------------------------------------------------------------------------------------------------------------------------------------------------------------------|
| Operator:              | *** Herdtweck ***                                                                                                                                                                                                                                                                                                                                                                      |
| Molecular Formula:     | C <sub>6</sub> H <sub>7</sub> N O <sub>3</sub>                                                                                                                                                                                                                                                                                                                                         |
| Crystal Color / Shape  | Colorless plate                                                                                                                                                                                                                                                                                                                                                                        |
| Crystal Size           | Approximate size of crystal fragment used for data collection:<br>0.08 × 0.36 × 0.56 mm                                                                                                                                                                                                                                                                                                |
| Molecular Weight:      | 141.13 a.m.u.                                                                                                                                                                                                                                                                                                                                                                          |
| F <sub>000</sub> :     | 592                                                                                                                                                                                                                                                                                                                                                                                    |
| Systematic Absences:   | h00: h≠2n; 0k0: k≠2n, 00l: l≠2n                                                                                                                                                                                                                                                                                                                                                        |
| Space Group:           | Orthorhombic <i>P</i> 2 <sub>1</sub> 2 <sub>1</sub> 2 <sub>1</sub> (I.T.-No.: 19)                                                                                                                                                                                                                                                                                                      |
| Cell Constants:        | Least-squares refinement of 9954 reflections with the programs "APEX suite" and "SAINT" [1,2]; theta range 4.83° < $\theta$ < 64.98°; Cu(K $\alpha$ ); $\lambda$ = 154.180 pm<br><br>$a$ = 751.39(3) pm<br>$b$ = 1117.98(5) pm<br>$c$ = 1598.07(7) pm<br><br>$V$ = 1342.44(10) · 10 <sup>6</sup> pm <sup>3</sup> ; $Z$ = 8; $D_{\text{calc}}$ = 1.396 g cm <sup>-3</sup> ; Mos. = 0.77 |
| Diffractometer:        | Kappa APEX II (Area Diffraction System; BRUKER AXS); sealed tube; graphite monochromator; 40 kV; 30 mA; $\lambda$ = 154.180 pm; Cu(K $\alpha$ )                                                                                                                                                                                                                                        |
| Temperature:           | (20±1) °C; (293±1) K                                                                                                                                                                                                                                                                                                                                                                   |
| Measurement Range:     | 4.83° < $\theta$ < 64.98°; h: -8/8, k: -11/12, l: -18/18                                                                                                                                                                                                                                                                                                                               |
| Measurement Time:      | 2 × 15 s per film                                                                                                                                                                                                                                                                                                                                                                      |
| Measurement Mode:      | measured: 19 runs; 4977 films / scaled: 18 runs; 4617 films<br>$\phi$ - and $\omega$ -movement; Increment: $\Delta\phi/\Delta\omega$ = 1.00°; dx = 35.0 mm                                                                                                                                                                                                                             |
| LP - Correction:       | Yes [2]                                                                                                                                                                                                                                                                                                                                                                                |
| Intensity Correction   | No/Yes; during scaling [2]                                                                                                                                                                                                                                                                                                                                                             |
| Absorption Correction: | Multi-scan; during scaling; $\mu$ = 0.971 mm <sup>-1</sup> [2]<br>Correction Factors: $T_{\text{min}}$ = 0.6561 $T_{\text{max}}$ = 0.7526                                                                                                                                                                                                                                              |
| Reflection Data:       | 22880 reflections were integrated and scaled<br>134 reflections systematic absent and rejected<br>22746 reflections to be merged                                                                                                                                                                                                                                                       |

|                                  |                                                                                                                                                                                                                  |                                                             |
|----------------------------------|------------------------------------------------------------------------------------------------------------------------------------------------------------------------------------------------------------------|-------------------------------------------------------------|
|                                  | 2226                                                                                                                                                                                                             | independent reflections                                     |
|                                  | 0.028                                                                                                                                                                                                            | $R_{\text{int}}$ : (basis $F_o^2$ )                         |
|                                  | 2226                                                                                                                                                                                                             | independent reflections (all) were used in refinements      |
|                                  | 2116                                                                                                                                                                                                             | independent reflections with $I_o > 2\sigma(I_o)$           |
|                                  | 97.8 %                                                                                                                                                                                                           | completeness of the data set                                |
|                                  | 238                                                                                                                                                                                                              | parameter full-matrix refinement                            |
|                                  | 9.4                                                                                                                                                                                                              | reflections per parameter                                   |
| Solution:                        | Direct Methods [3]; Difference Fourier syntheses                                                                                                                                                                 |                                                             |
| Refinement Parameters:           | In the asymmetric unit:                                                                                                                                                                                          |                                                             |
|                                  | 20                                                                                                                                                                                                               | Non-hydrogen atoms with anisotropic displacement parameters |
|                                  | 14                                                                                                                                                                                                               | Hydrogen atoms with isotropic displacement parameters       |
| Hydrogen Atoms:                  | All hydrogen atom positions were found in the difference map calculated from the model containing all non-hydrogen atoms. The hydrogen positions were refined with individual isotropic displacement parameters. |                                                             |
| Atomic Form Factors:             | For neutral atoms and anomalous dispersion [4]                                                                                                                                                                   |                                                             |
| Extinction Correction:           | $F_c(\text{korr}) = kF_c[1 + 0.001 \cdot \varepsilon \cdot F_c^2 \cdot \lambda^3 / \sin(2\theta)]^{-1/4}$ SHELXL-97 [5]<br>$\varepsilon$ refined to $\varepsilon = 0.0007(2)$                                    |                                                             |
| Weighting Scheme:                | $w^{-1} = \sigma^2(F_o^2) + (a \cdot P)^2 + b \cdot P$<br>with a: 0.0426; b: 0.1805; P: $[\text{Maximum}(0 \text{ or } F_o^2) + 2 \cdot F_c^2] / 3$                                                              |                                                             |
| Shift/Err:                       | Less than 0.001 in the last cycle of refinement:                                                                                                                                                                 |                                                             |
| Resid. Electron Density:         | +0.12 $e^-/\text{\AA}^3$ ; -0.10 $e^-/\text{\AA}^3$                                                                                                                                                              |                                                             |
| R1:                              | $\Sigma( F_o  -  F_c ) / \Sigma  F_o $                                                                                                                                                                           |                                                             |
| $[F_o > 4\sigma(F_o)$ ; N=2116]: |                                                                                                                                                                                                                  | = 0.0272                                                    |
| [all reflctns; N=2226]:          |                                                                                                                                                                                                                  | = 0.0288                                                    |
| wR2:                             | $[\Sigma w(F_o^2 - F_c^2)^2 / \Sigma w(F_o^2)^2]^{1/2}$                                                                                                                                                          |                                                             |
| $[F_o > 4\sigma(F_o)$ ; N=2116]: |                                                                                                                                                                                                                  | = 0.0778                                                    |
| [all reflctns; N=2226]:          |                                                                                                                                                                                                                  | = 0.0792                                                    |
| Goodness of fit:                 | $[\Sigma w(F_o^2 - F_c^2)^2 / (\text{NO} - \text{NV})]^{1/2}$                                                                                                                                                    |                                                             |
|                                  |                                                                                                                                                                                                                  | = 1.042                                                     |
| Flack's Parameter :              | $x = 0.02(21)$                                                                                                                                                                                                   |                                                             |
| Remarks:                         | Refinement expression $\Sigma w(F_o^2 - F_c^2)^2$                                                                                                                                                                |                                                             |
|                                  | The correct enantiomere is proved by Flack's Parameter.                                                                                                                                                          |                                                             |

## **References:**

- [1] APEX suite of crystallographic software. APEX 2 Version 2008.4. Bruker AXS Inc., Madison, Wisconsin, USA (2008).
- [2] SAINT, Version 7.56a and SADABS Version 2008/1. Bruker AXS Inc., Madison, Wisconsin, USA (2008).
- [3] Altomare, A.; Cascarano, G.; Giacovazzo, C.; Guagliardi, Moliterni A. G. G.; Burla, M. C.; Polidori, G.; Camalli, M.; Spagna, R. "**SIR97**", A New Tool for Crystal Structure Determination and Refinement; *J. Appl. Crystallogr.* **1999**, 32, 115-119.
- [4] International Tables for Crystallography, Vol. C, Tables 6.1.1.4 (pp. 500-502), 4.2.6.8 (pp. 219-222), and 4.2.4.2 (pp. 193-199), Wilson, A. J. C., Ed., Kluwer Academic Publishers, Dordrecht, The Netherlands, 1992.
- [5] Sheldrick, G. M. "**SHELXL-97**", University of Göttingen, Göttingen, Germany, (1998).
- [6] Spek, A. L. "**PLATON**", A Multipurpose Crystallographic Tool, Utrecht University, Utrecht, The Netherlands, (2010).
- [7] L. J. Farrugia, "**WinGX** (Version 1.70.01 January 2005) ", *J. Appl. Cryst.* **1999**, 32, 837-838.



## 6. HPLC traces of chiral alcohols

HPLC traces of chiral alcohol **6**

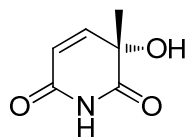

**6**

HPLC (AS-H, 250 × 4.6 mm, *n*-Hex/*i*-PrOH = 70/30, 1 mL/min).

Racemate

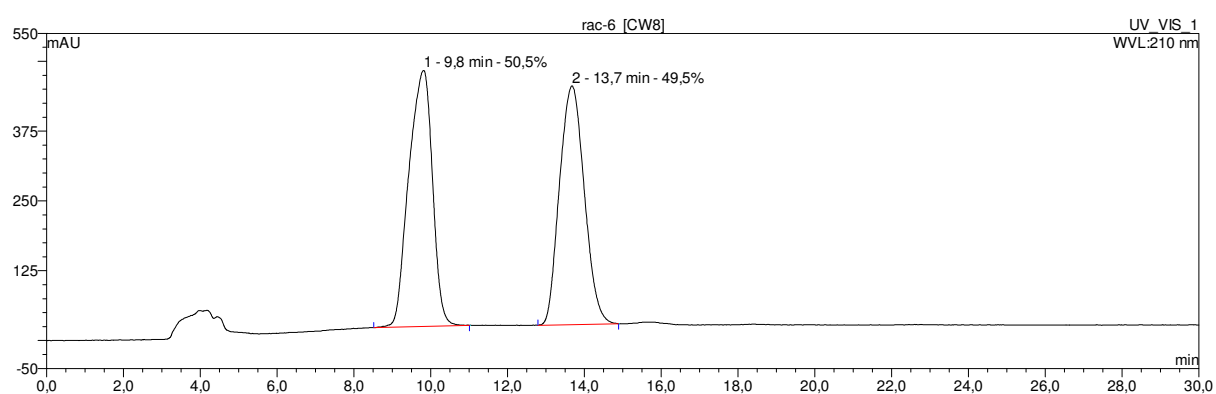

Enantioenriched (Table 1, entry 4)

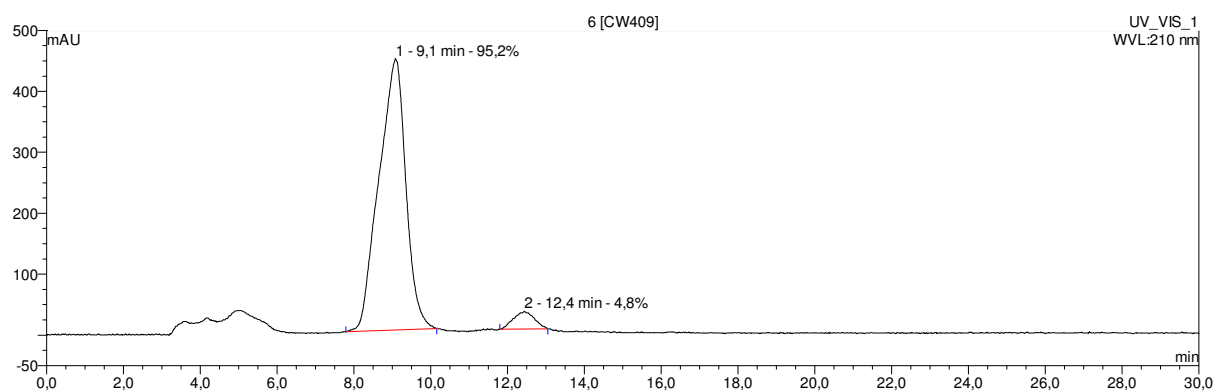

## HPLC traces of chiral alcohol **8**

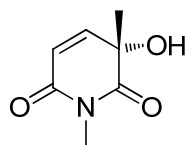

**8**

HPLC (AD-H, 250 × 4.6 mm, *n*-Hex/*i*-PrOH = 90/10, 1 mL/min).

Racemate

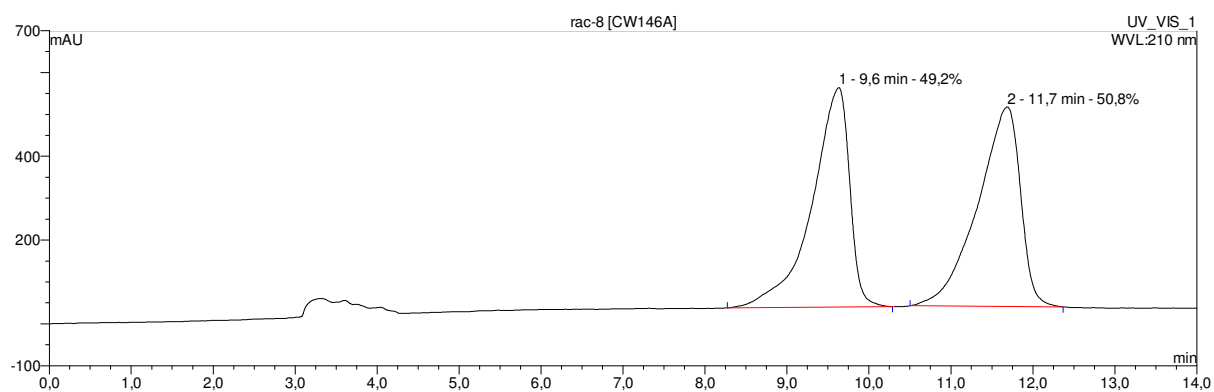

Reaction performed in the presence of template **1** (Table 1, entry 5)

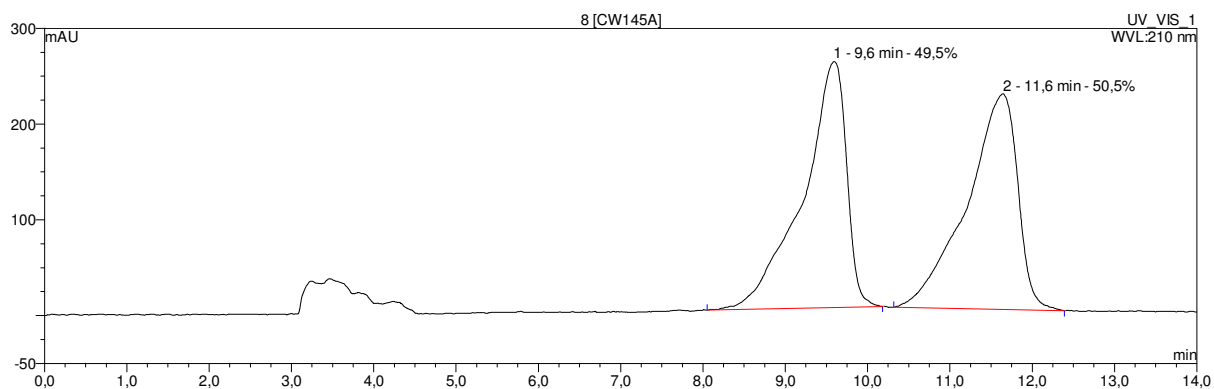

## HPLC traces of chiral alcohol **10**

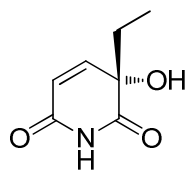

**10**

HPLC (AS-H, 250 × 4.6 mm, *n*-Hex/*i*-PrOH = 70/30, 1 mL/min).

### Racemate

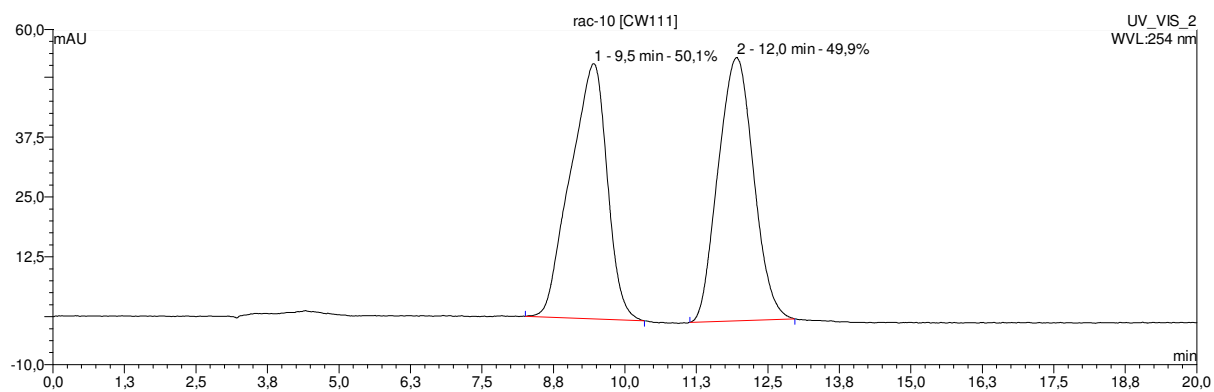

### Enantioenriched (Table 2, entry 1)

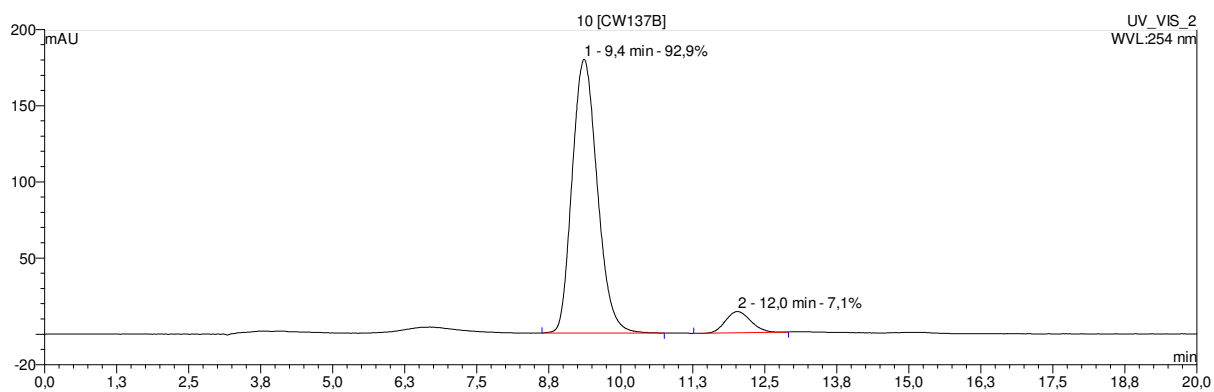

## HPLC traces of chiral alcohol **12**

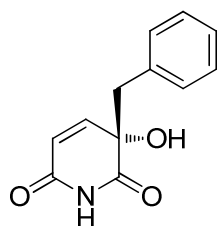

**12**

HPLC (AS-H, 250 × 4.6 mm, *n*-Hex/*i*-PrOH = 70/30, 1 mL/min).

### Racemate

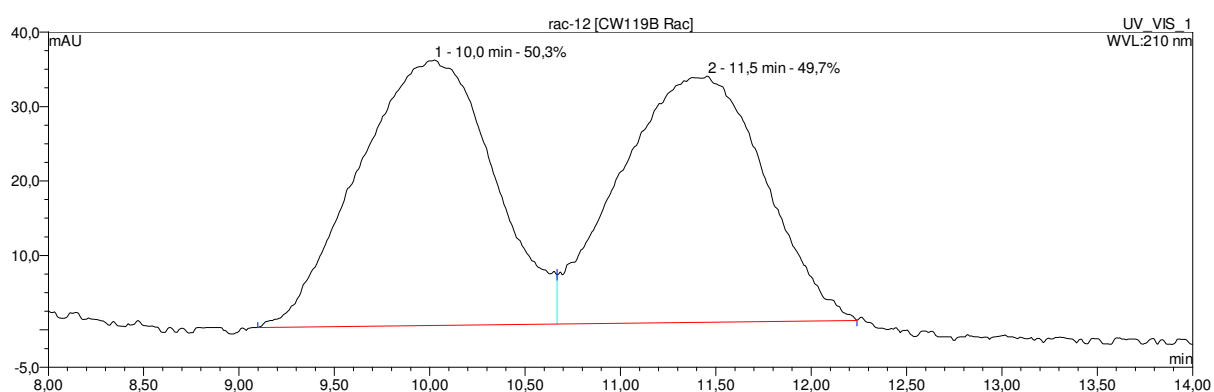

### Enantioenriched (Table 2, entry 2)

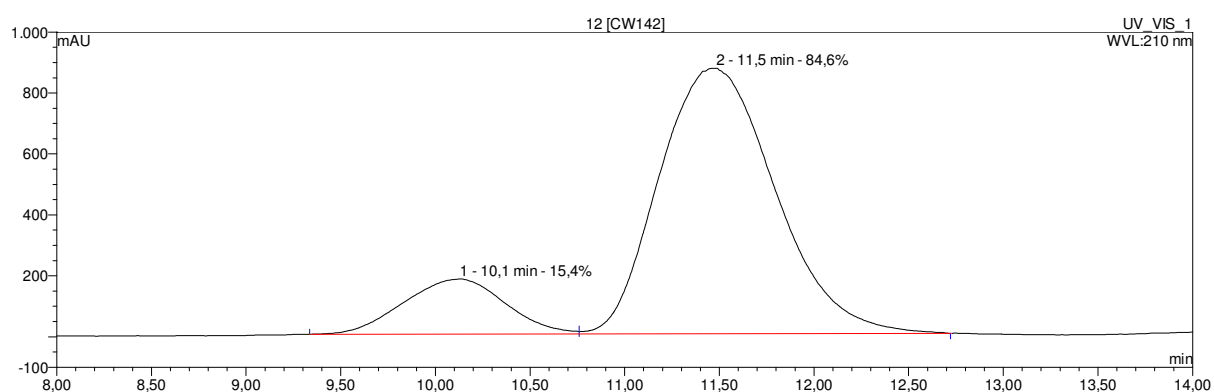

### HPLC traces of chiral alcohol **14**

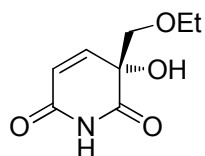

**14**

HPLC (AD-H, 250 × 4.6 mm, *n*-Hex/*i*-PrOH = 90/10, 1 mL/min).

#### Racemate

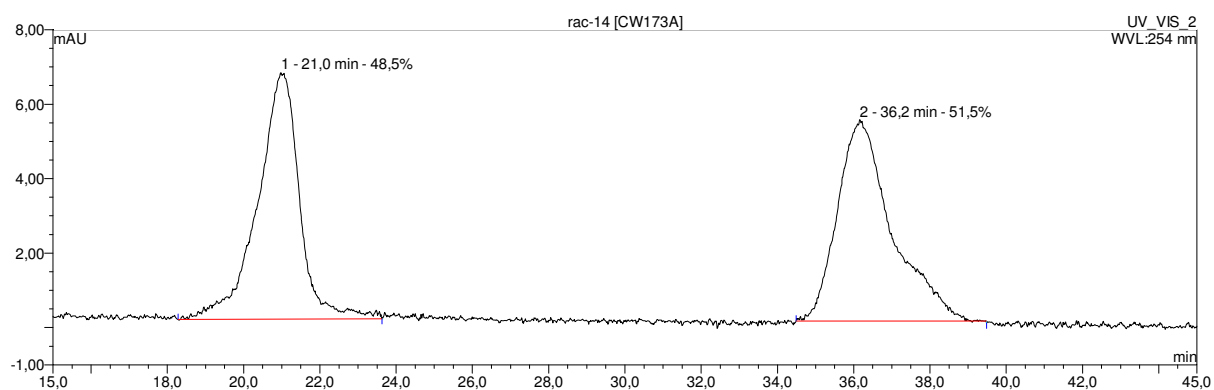

#### Enantioenriched (Table 2, entry 3)

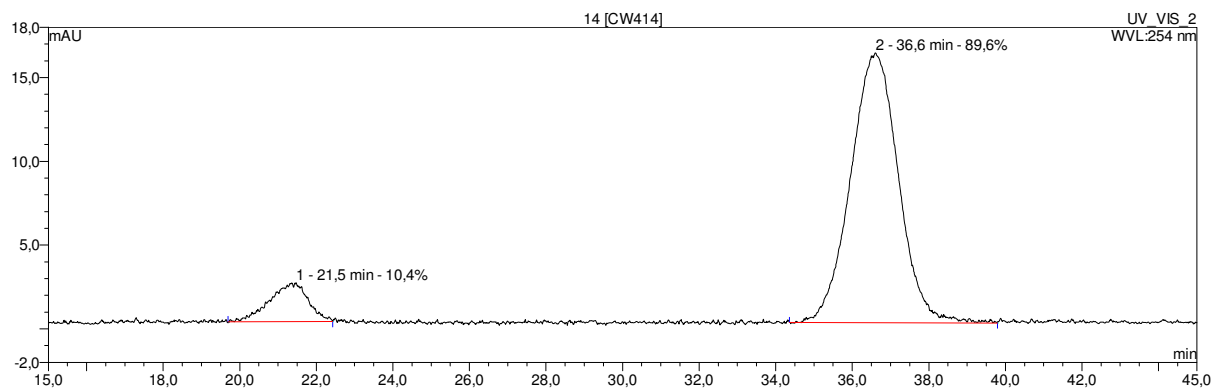

## HPLC traces of chiral alcohol **16**

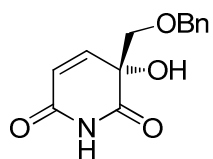

**16**

HPLC (OD-H, 250 × 4.6 mm, *n*-Hex/*i*-PrOH = 80/20, 1 mL/min).

### Racemate

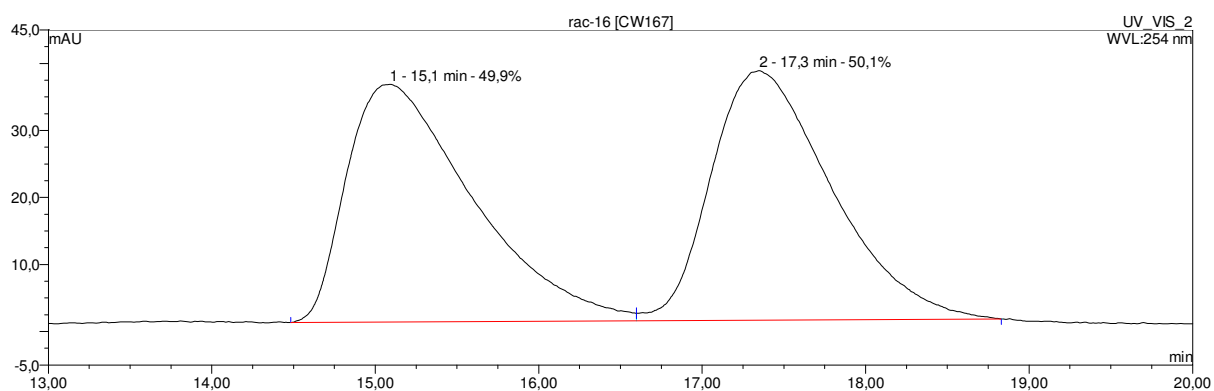

### Enantioenriched (Table 2, entry 4)

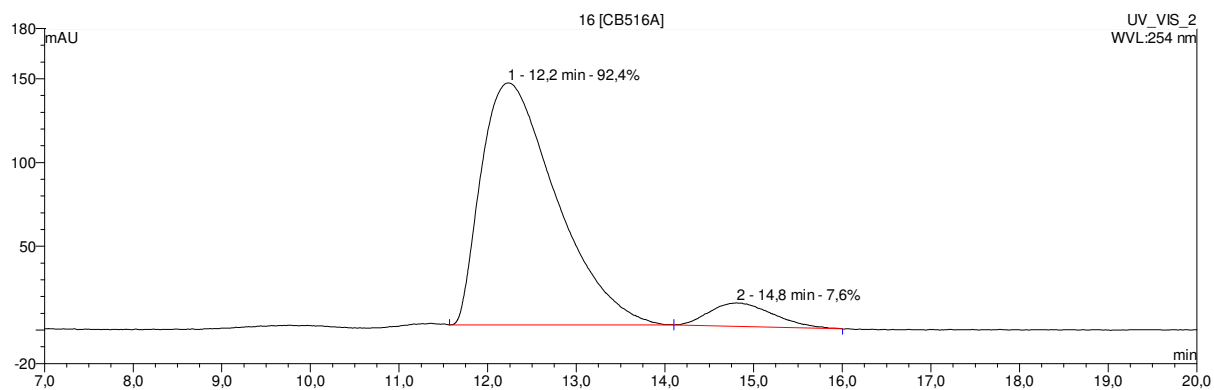

## HPLC traces of chiral alcohol **18**

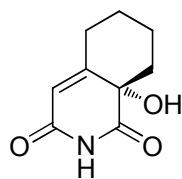

**18**

HPLC (OJ-H, 250 × 4.6 mm, *n*-Hex/*i*-PrOH = 70/30, 1 mL/min).

### Racemate

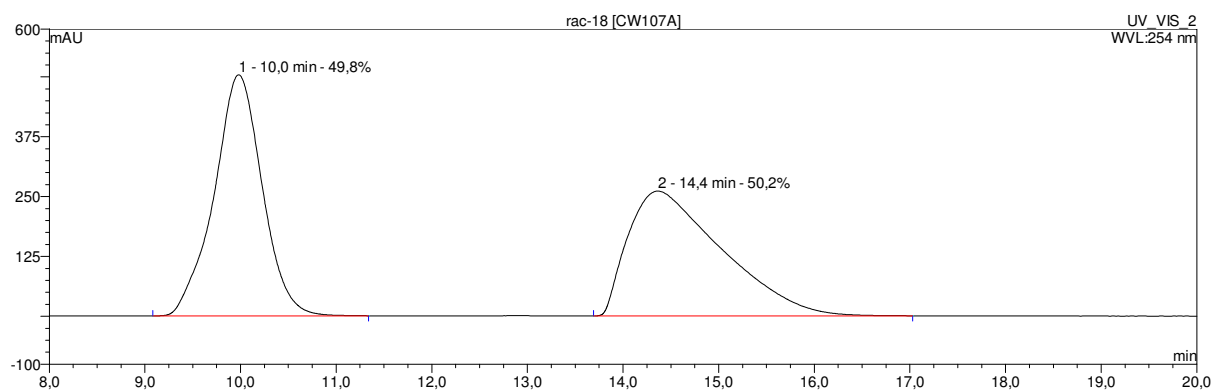

### Enantioenriched (Table 5, entry 2)

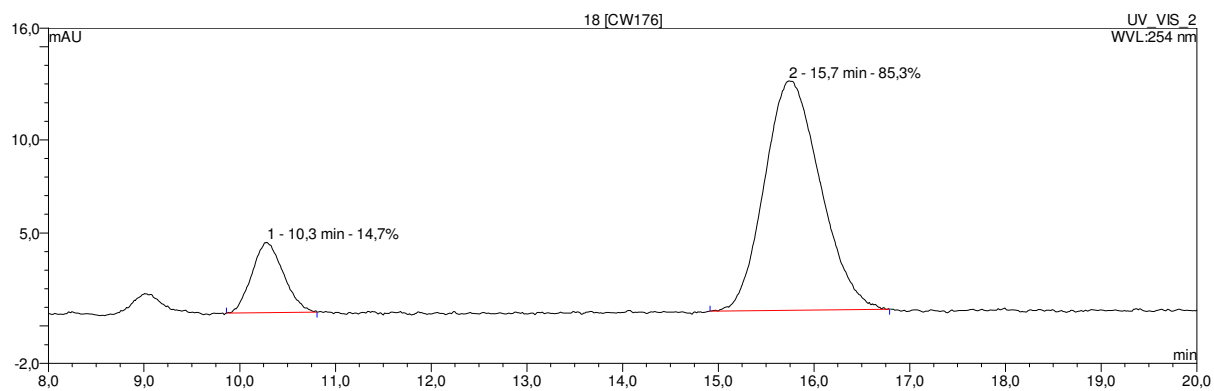



7. NMR spectra of new compounds

3-Ethyl-3-hydroxypyridine-2,6(1*H*,3*H*)-dione (*rac*-10)

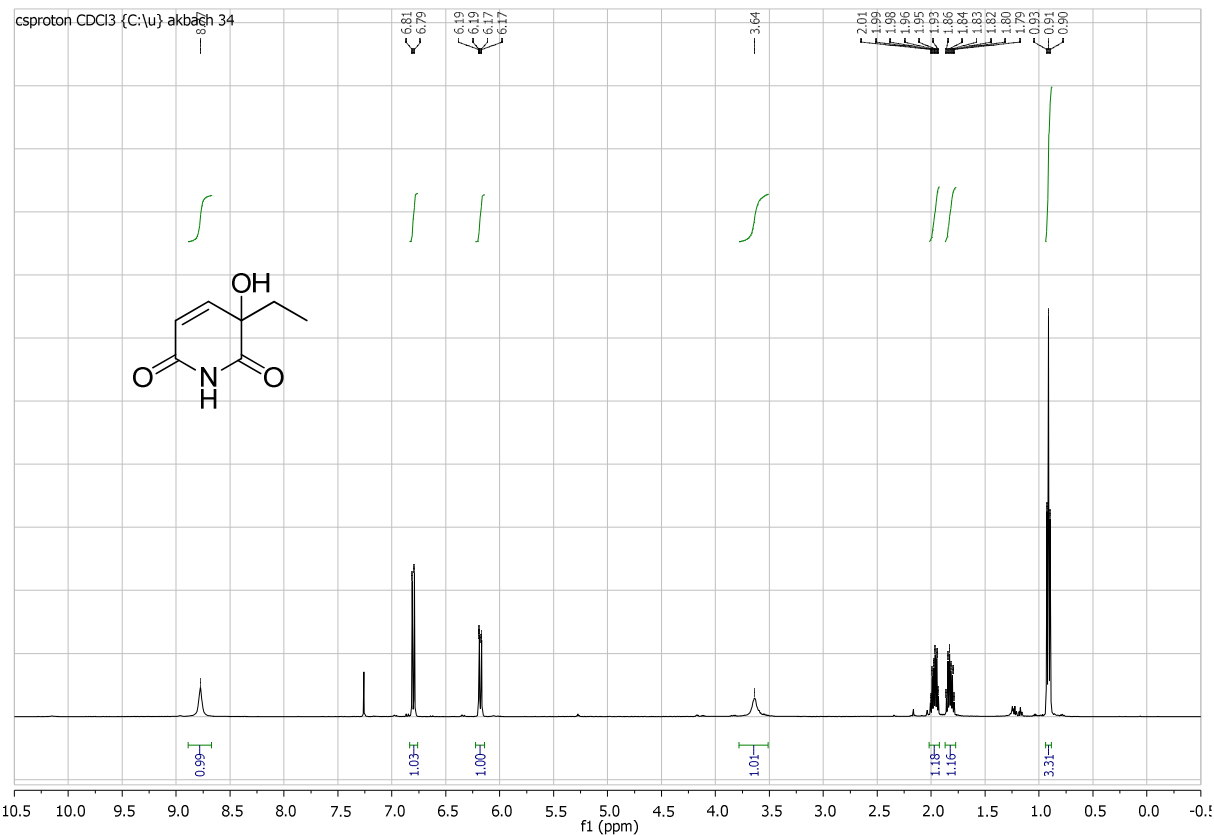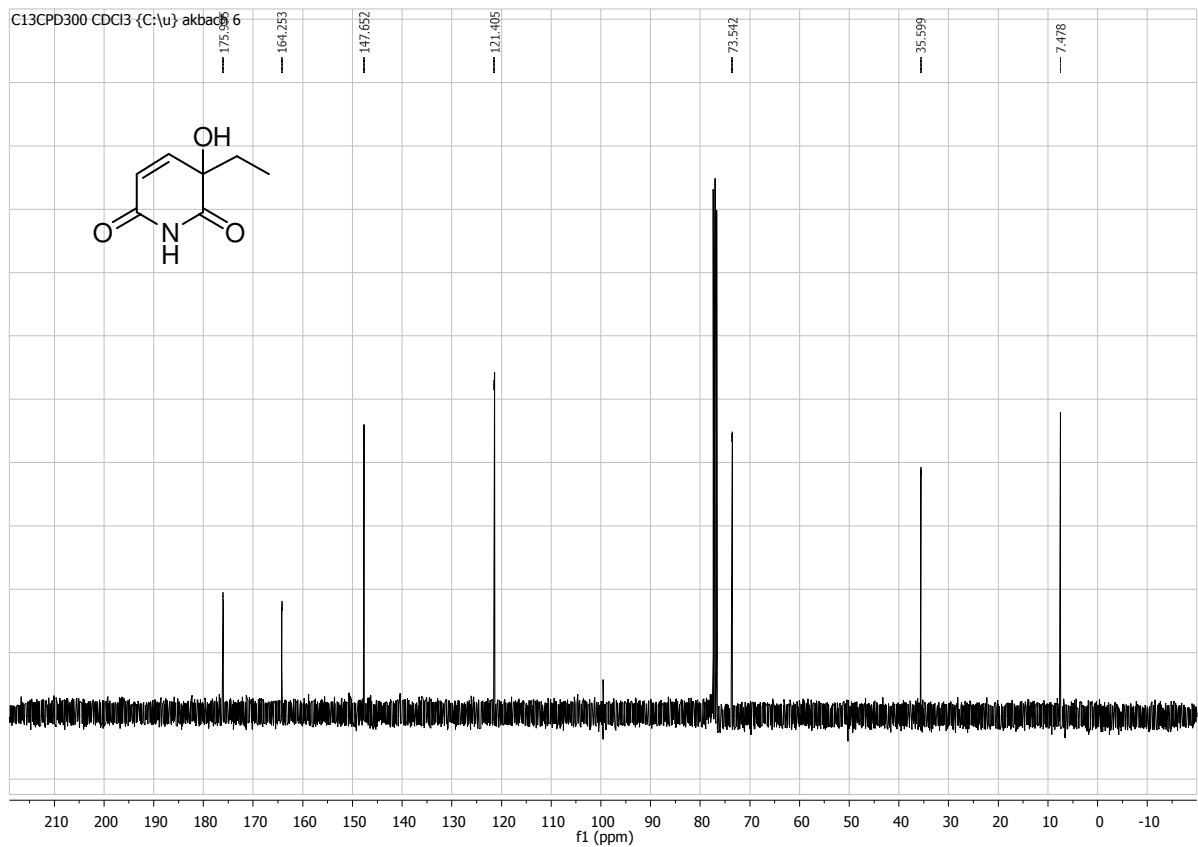

3-Benzyl-3-hydroxypyridine-2,6(1*H*,3*H*)-dione (*rac*-**12**)

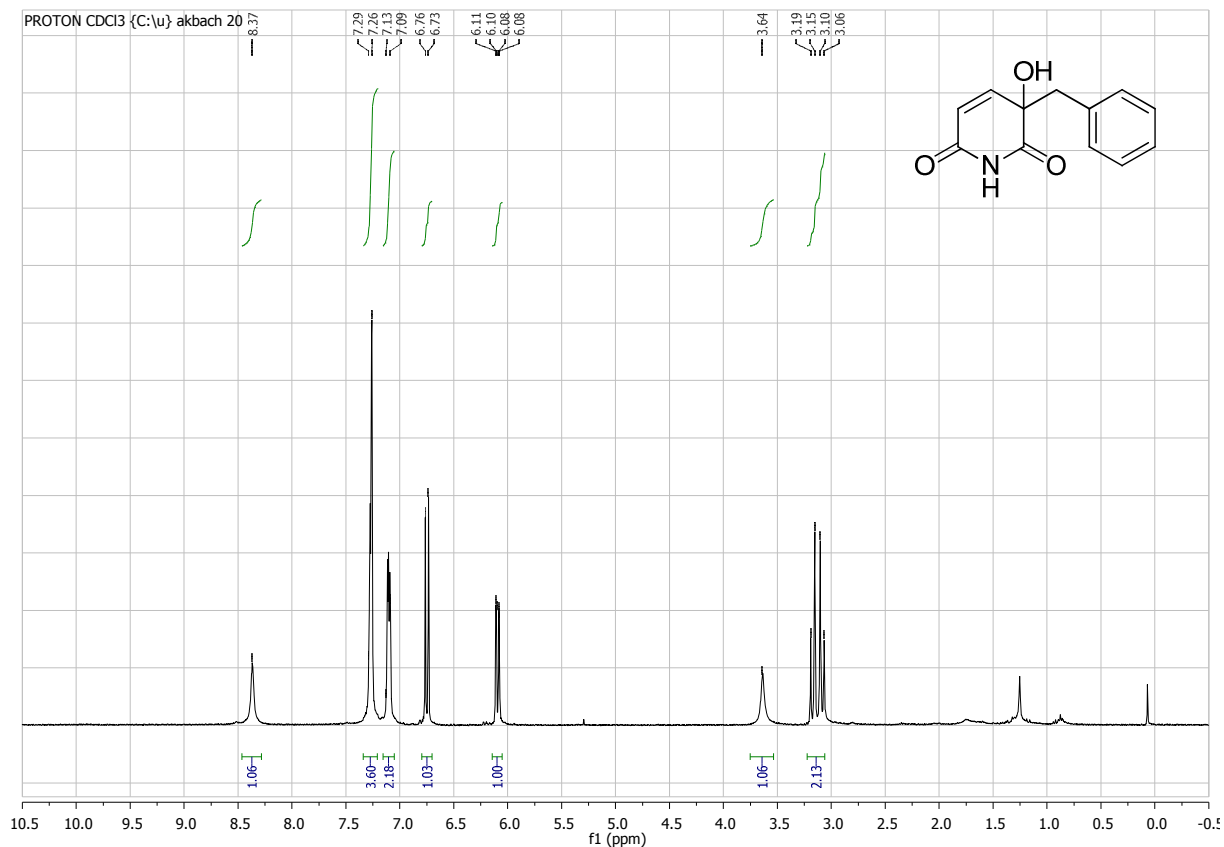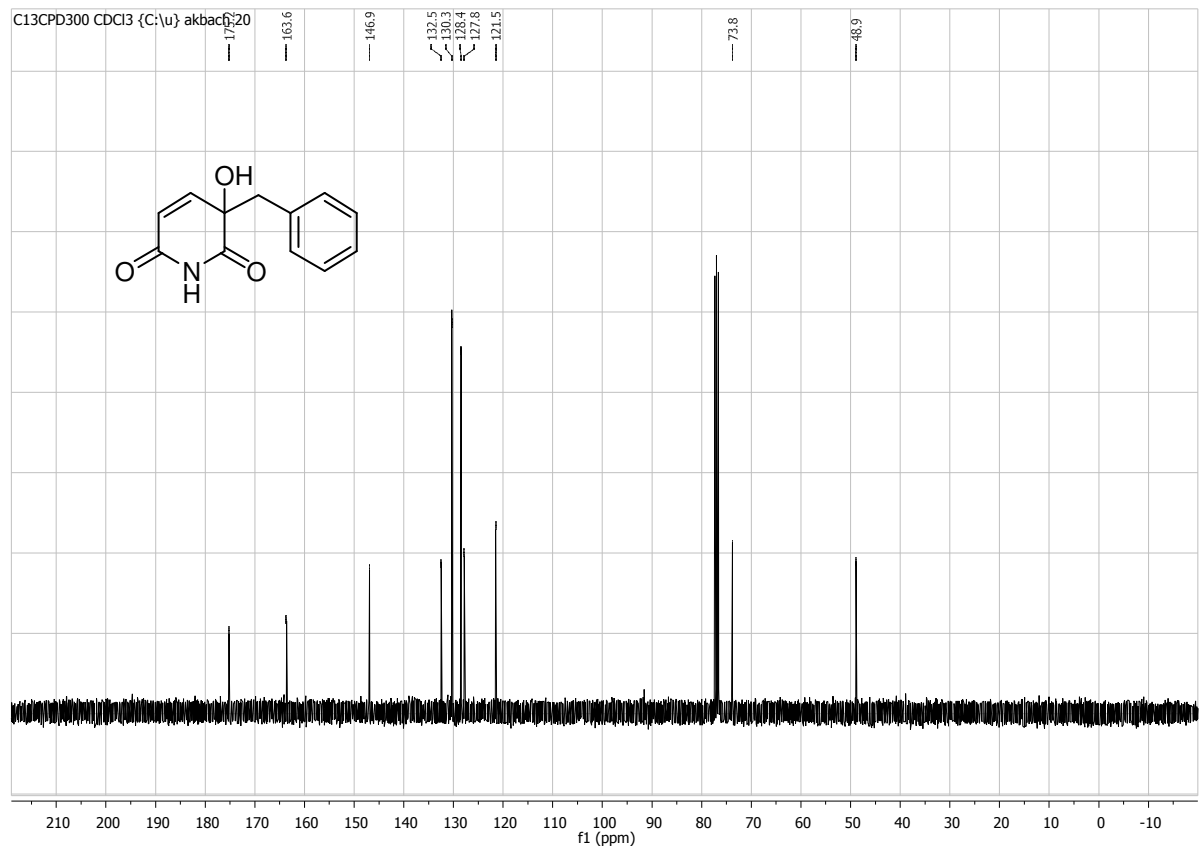

3-(Ethoxymethyl)pyridine 1-oxide

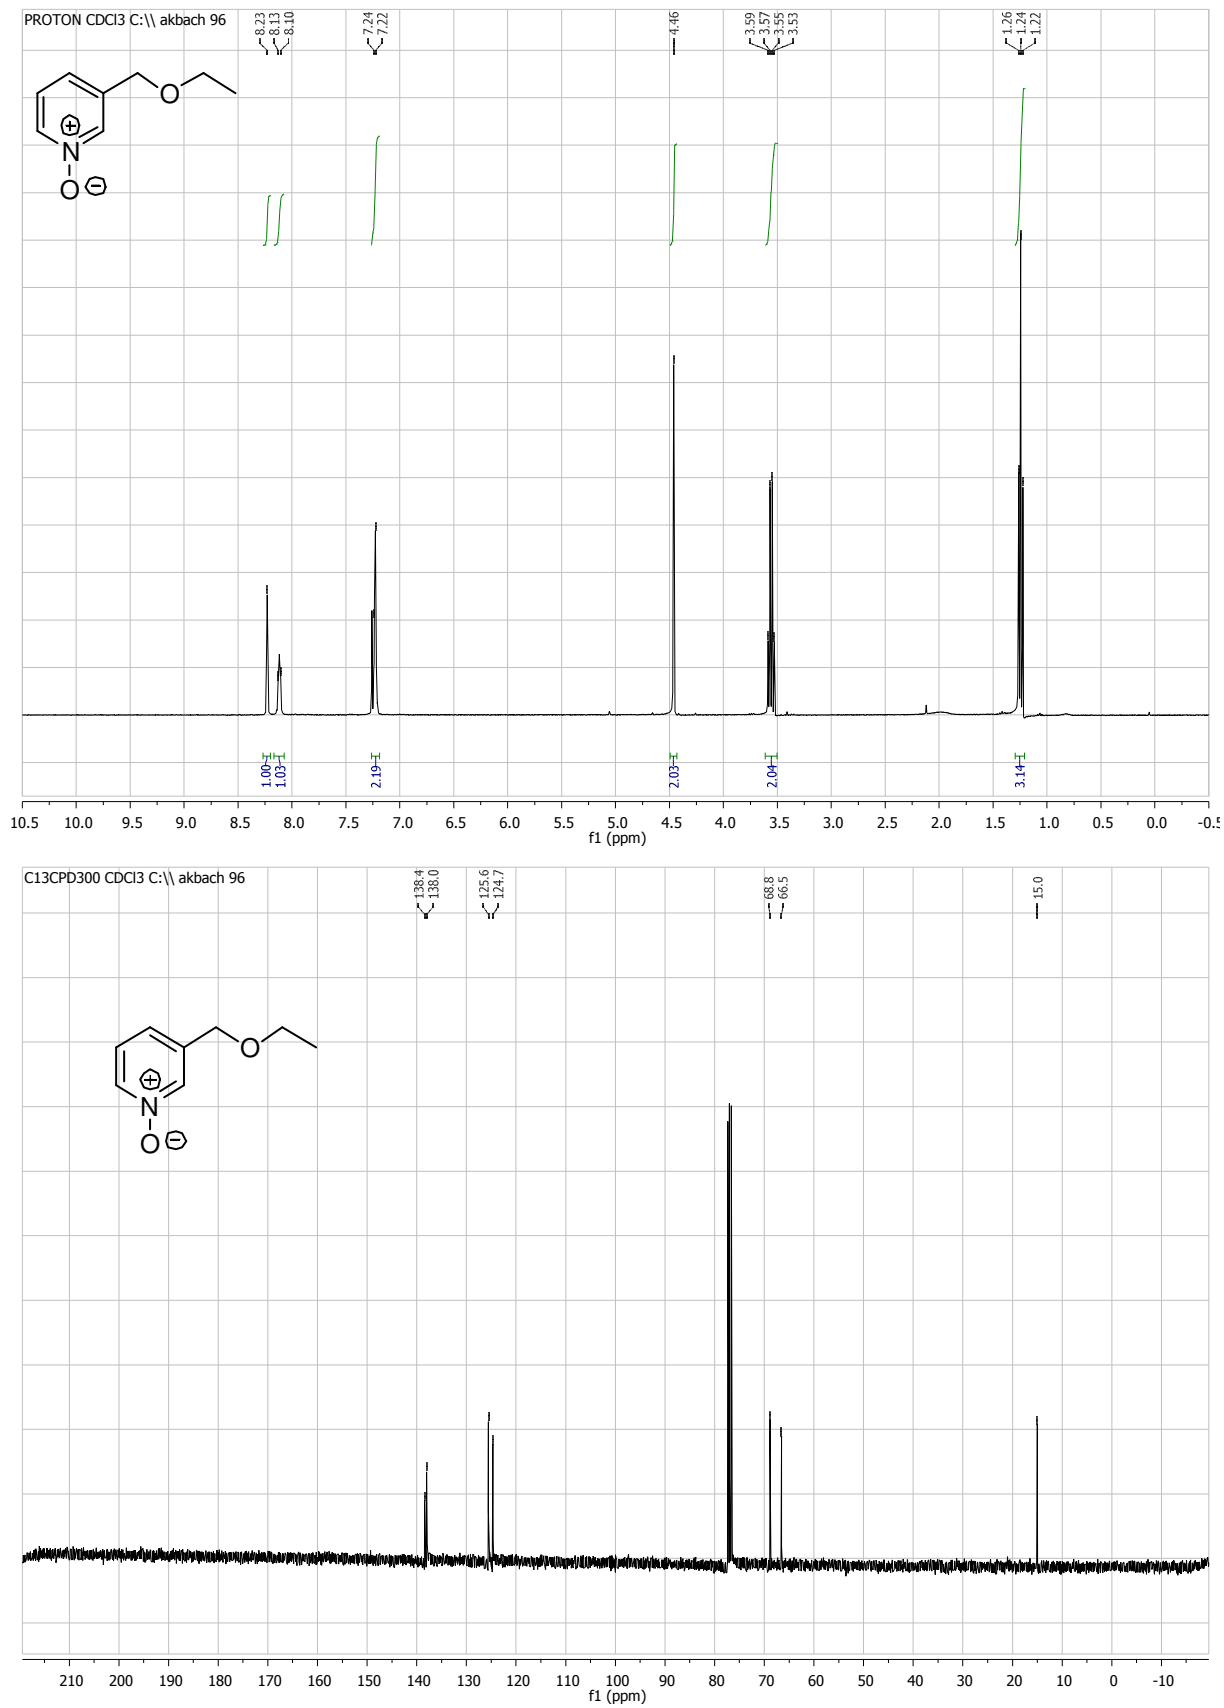

3-(Ethoxymethyl)pyridine-2(1H)-one (13)

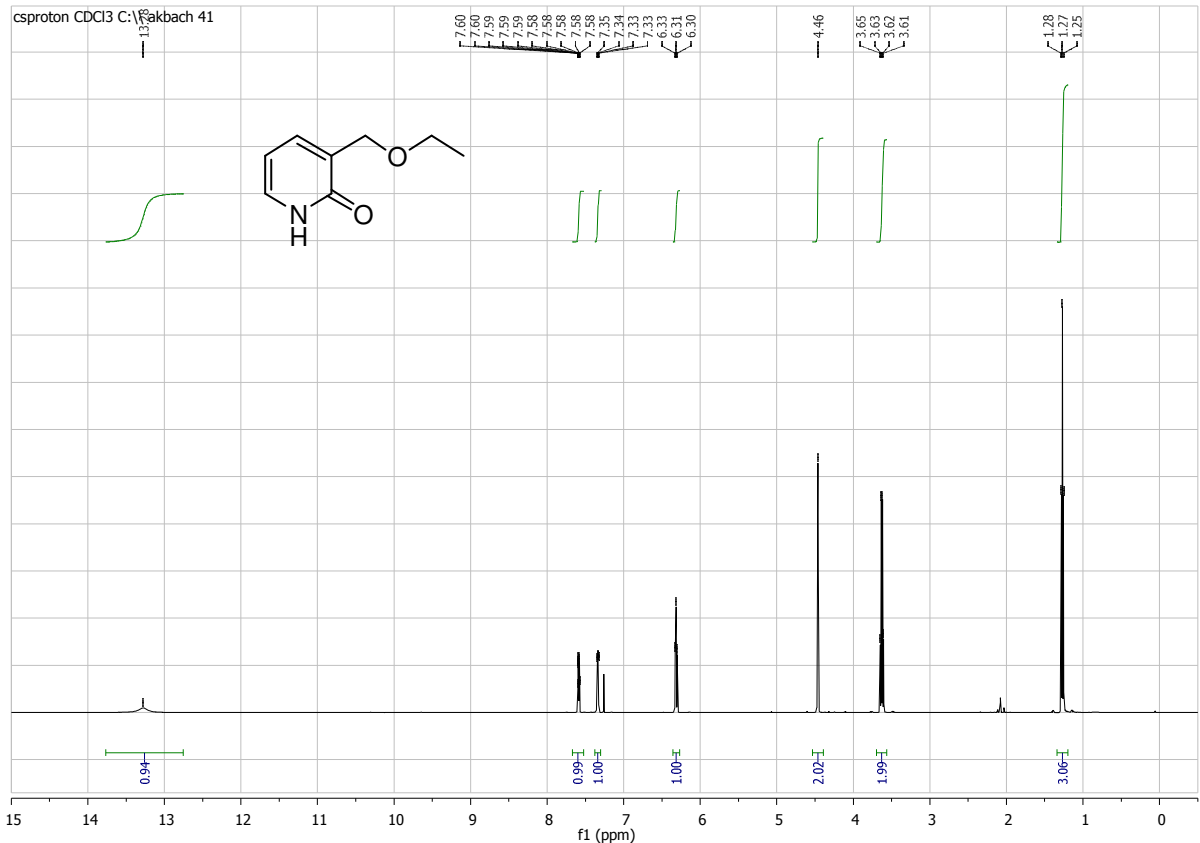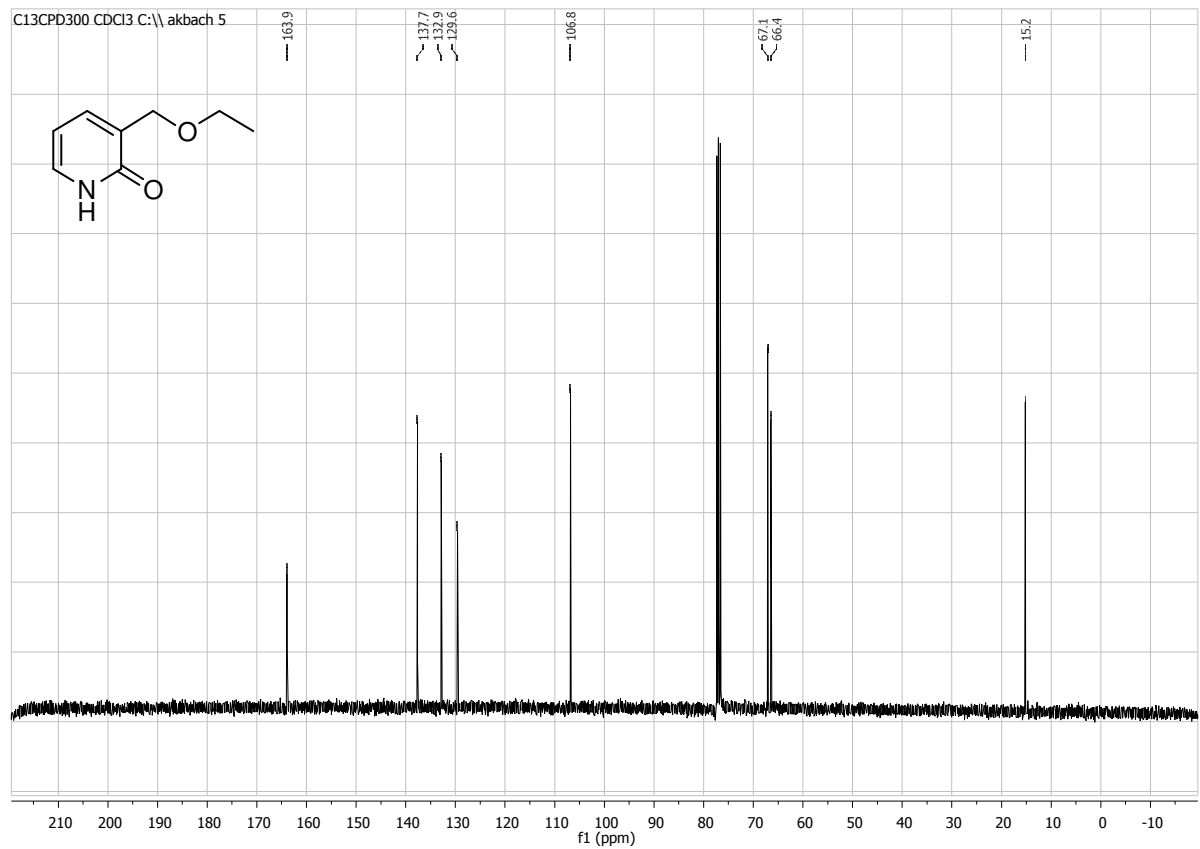

3-(Ethoxymethyl)-3-hydroxypyridine-2,6(1*H*,3*H*)-dione (*rac*-**14**)

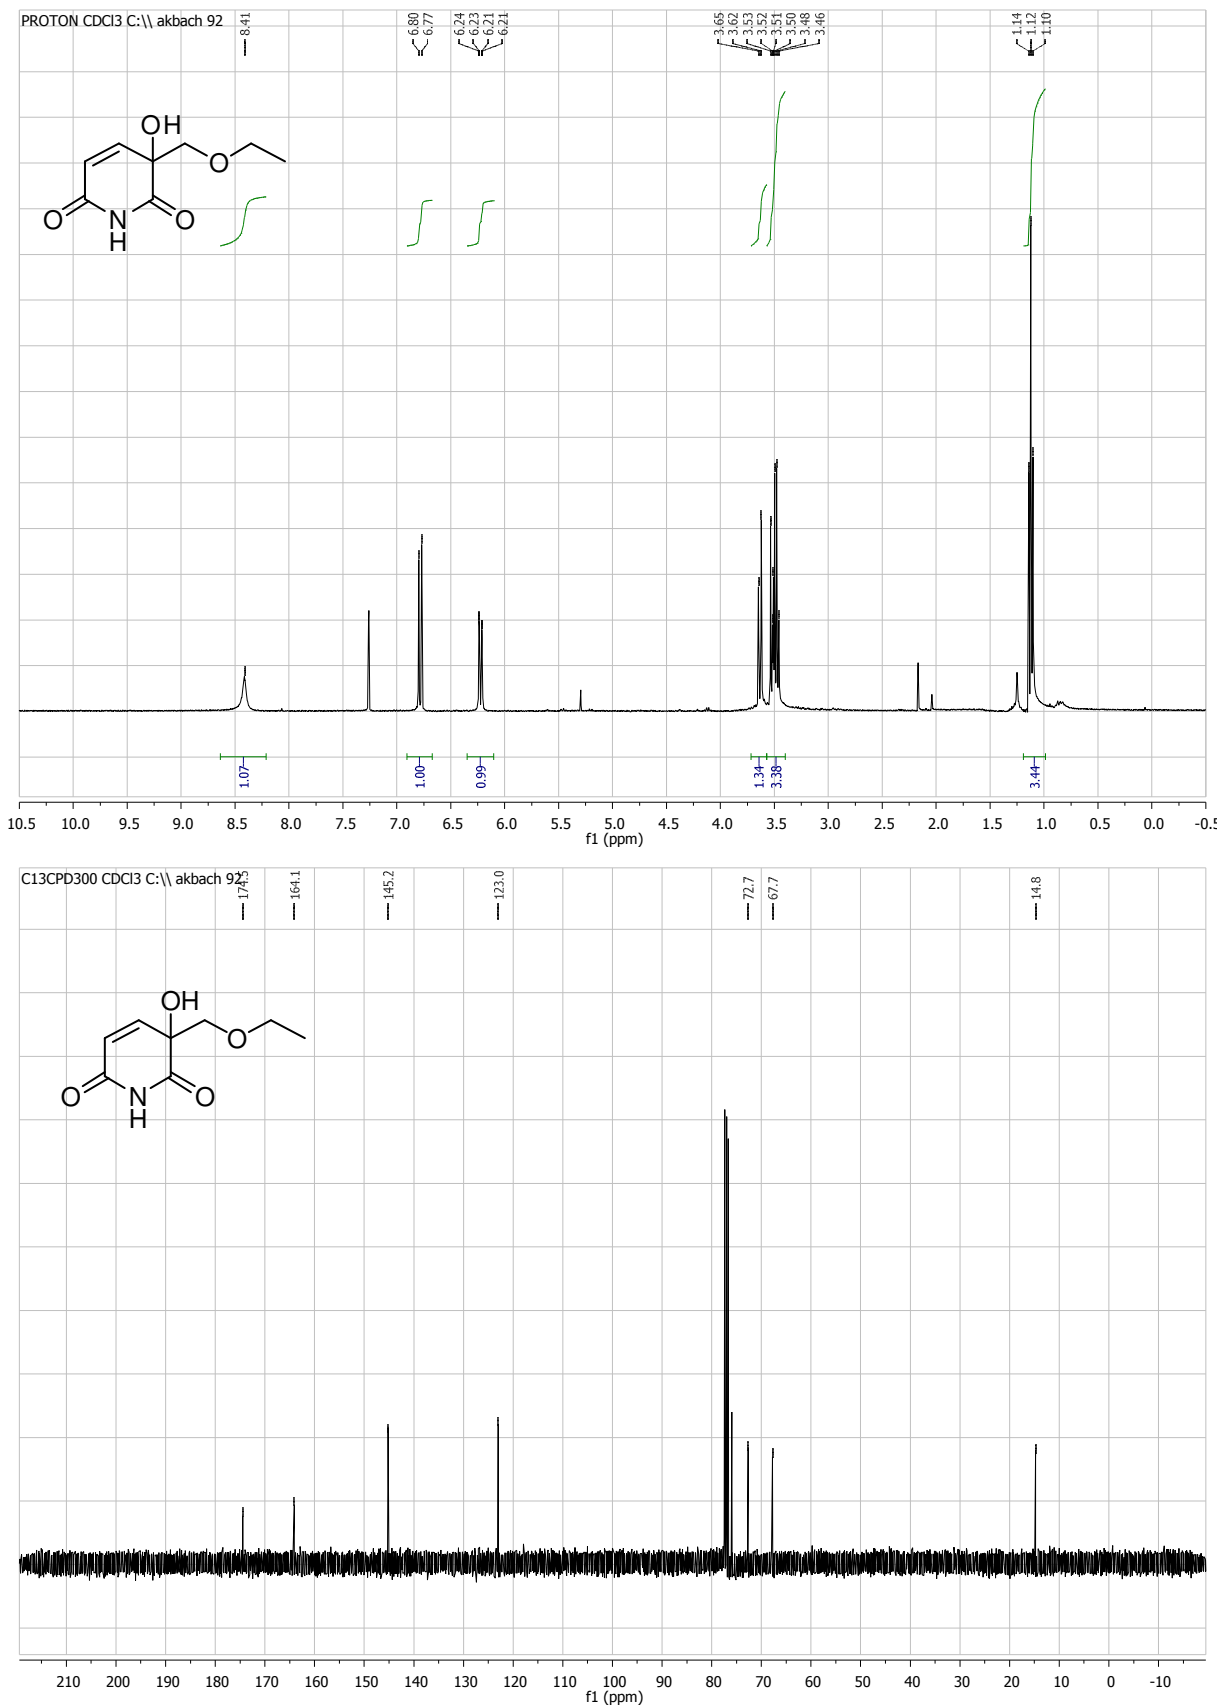

3-((Benzyloxy)methyl)pyridine 1-oxide

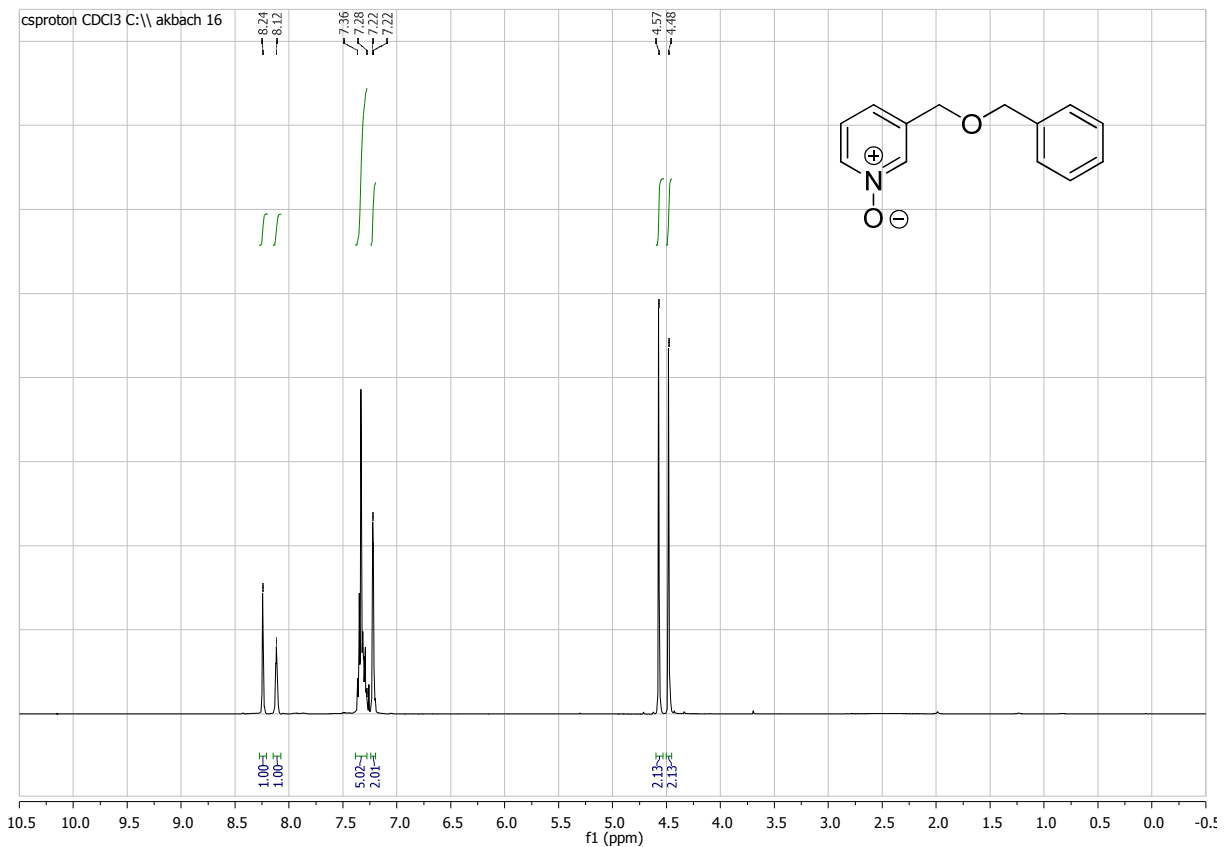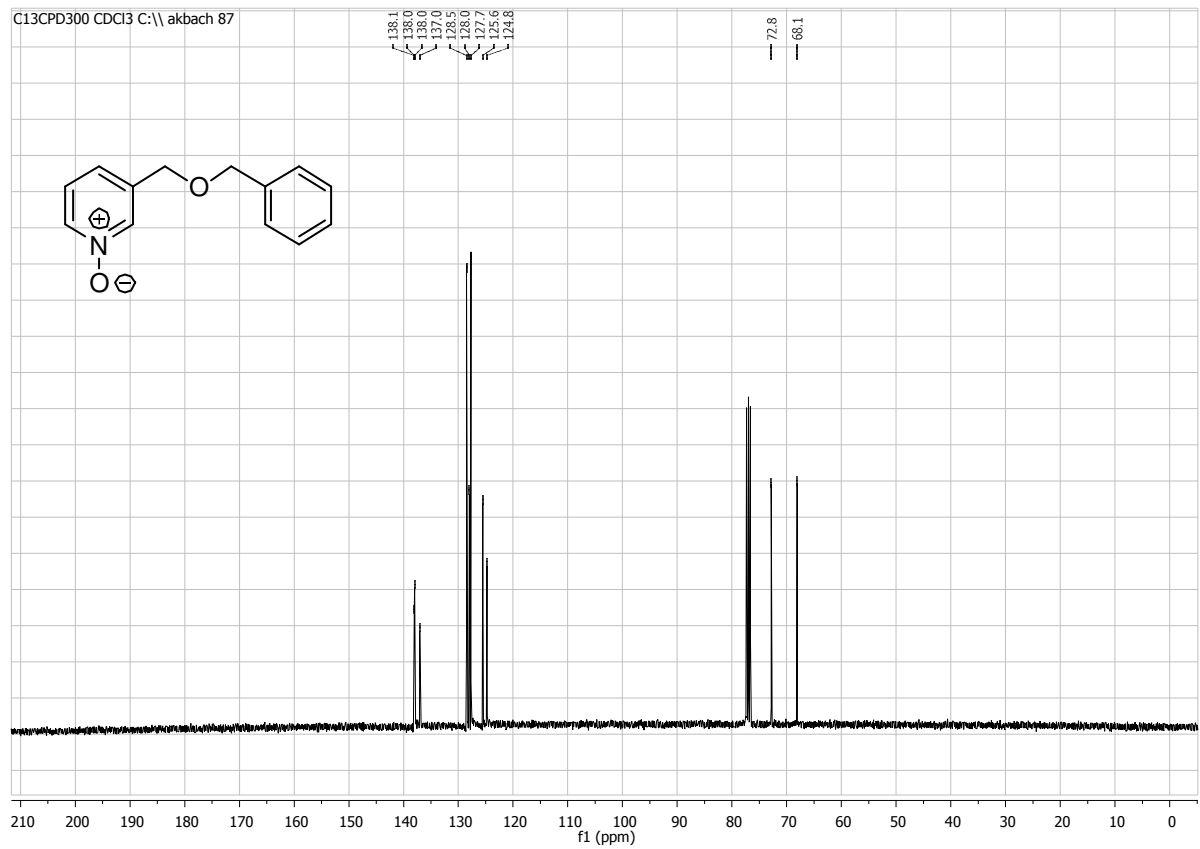

3-((Benzyloxy)methyl)pyridine-2(1*H*)-one (**15**)

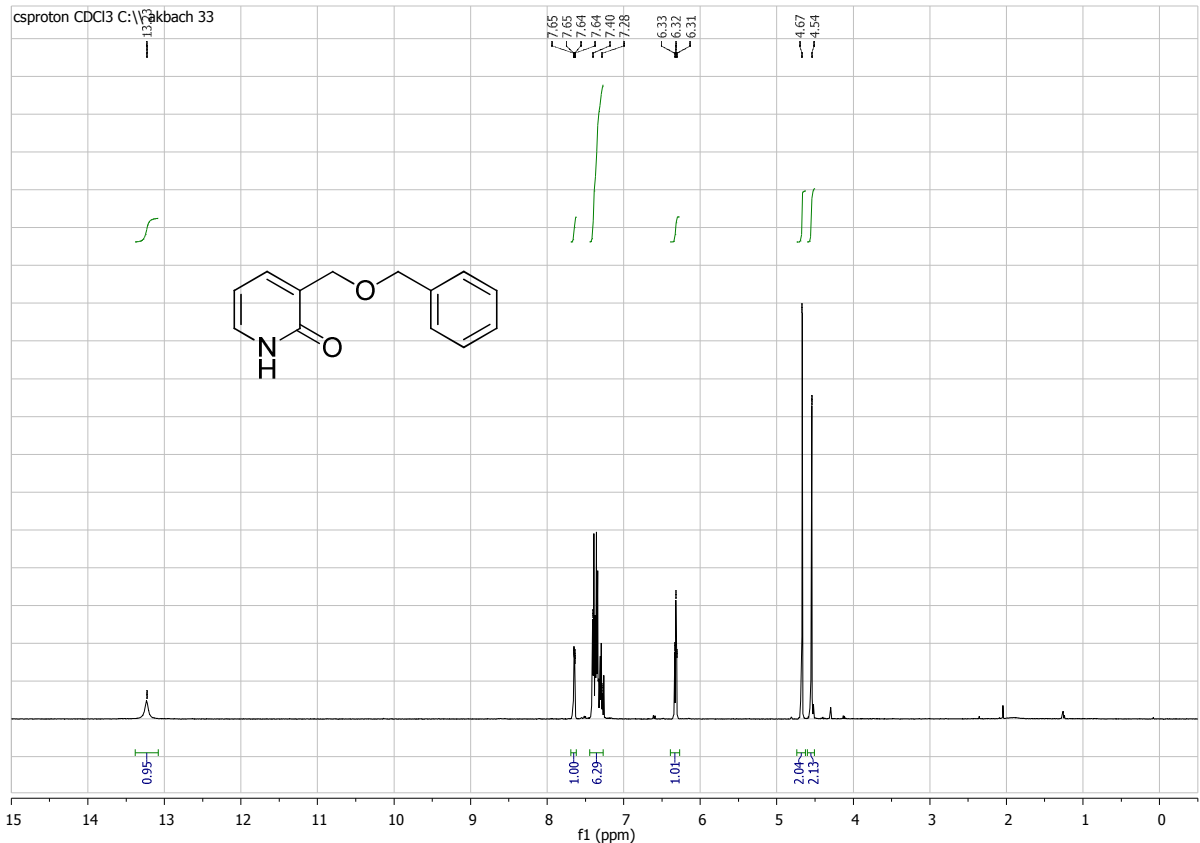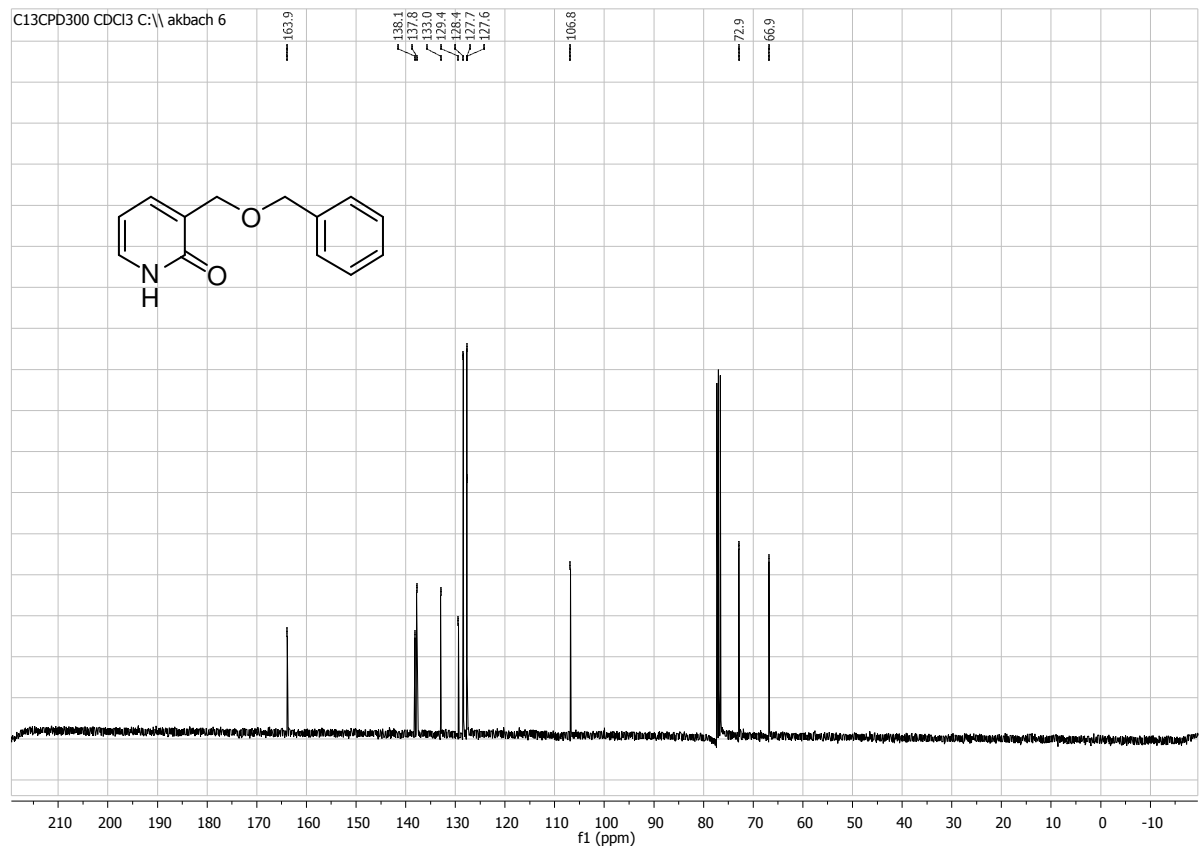



3-((Benzyloxy)methyl)-3-hydroxypyridine-2,6(1*H*,3*H*)-dione (*rac*-**16**)

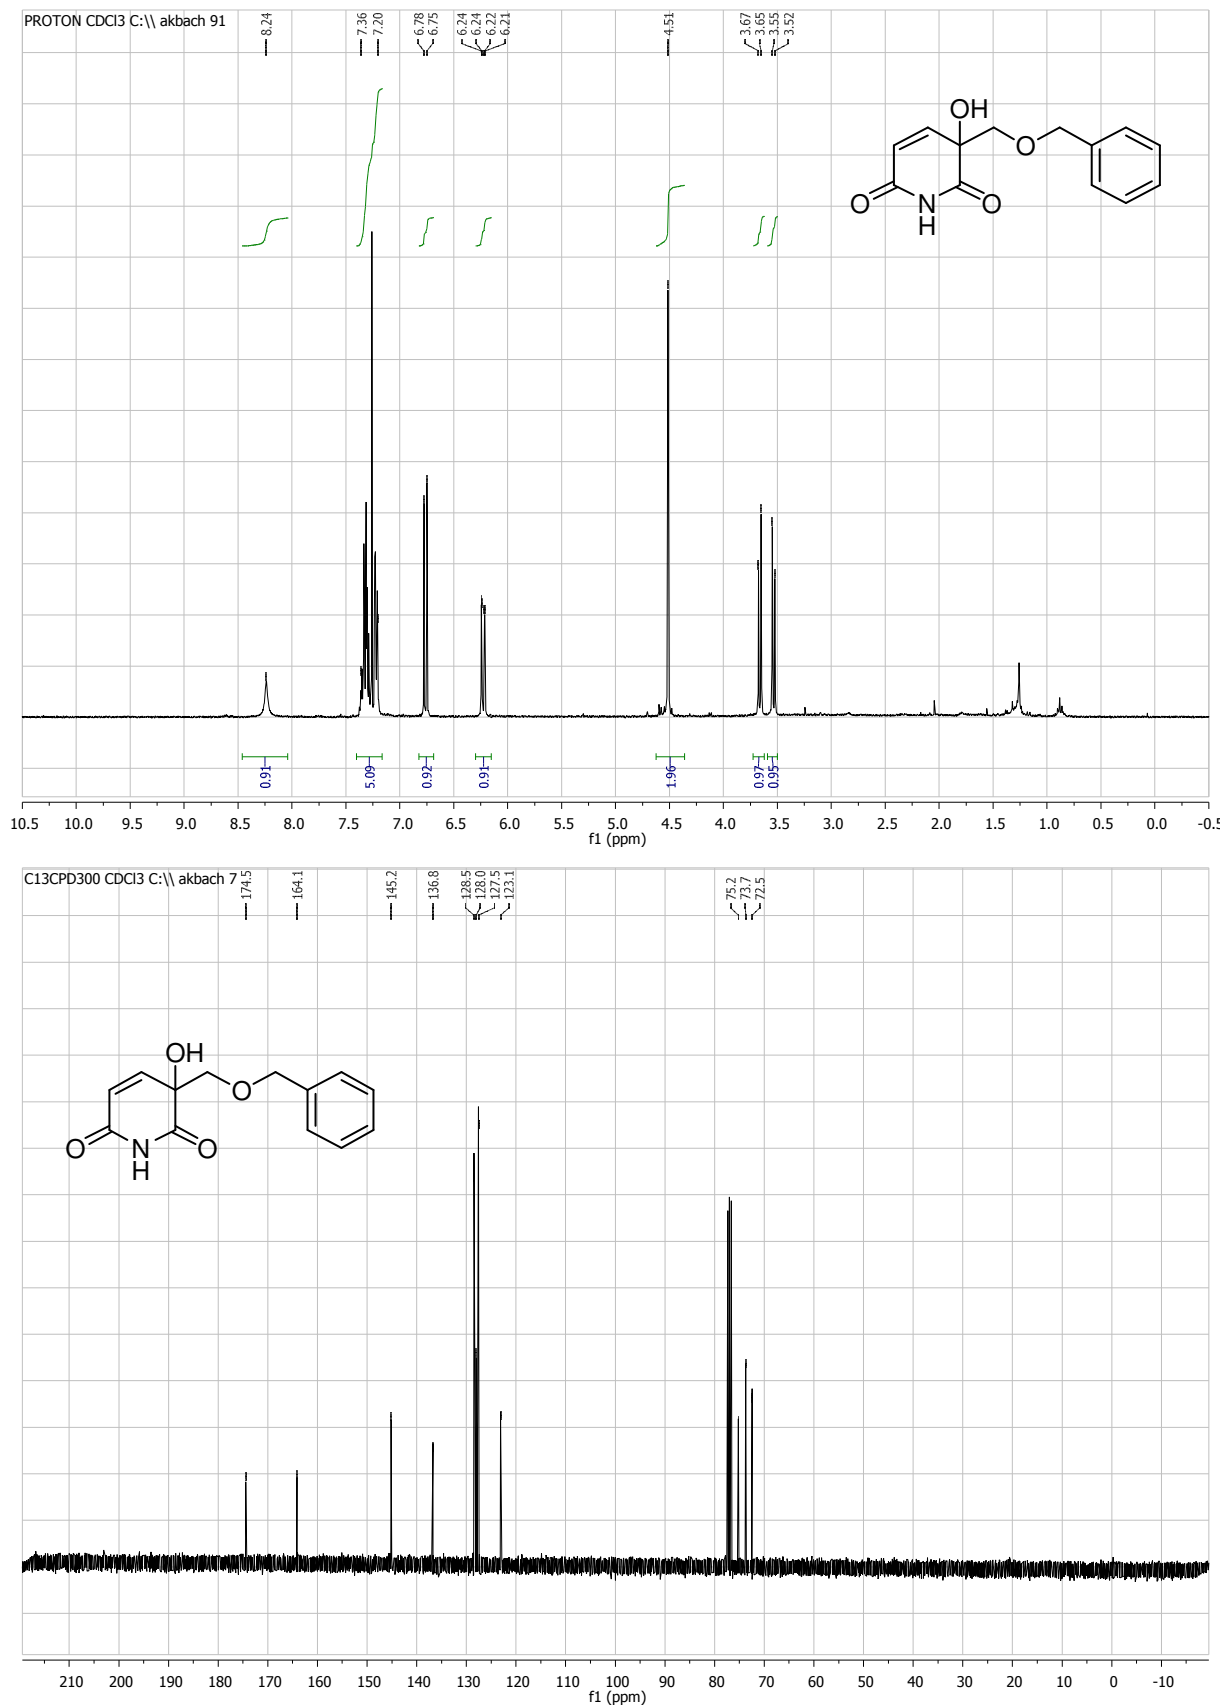

8a-Hydroxy-6,7,8,8a-tetrahydroisoquinoline-1,3(2*H*,5*H*)-dione (*rac*-**18**)

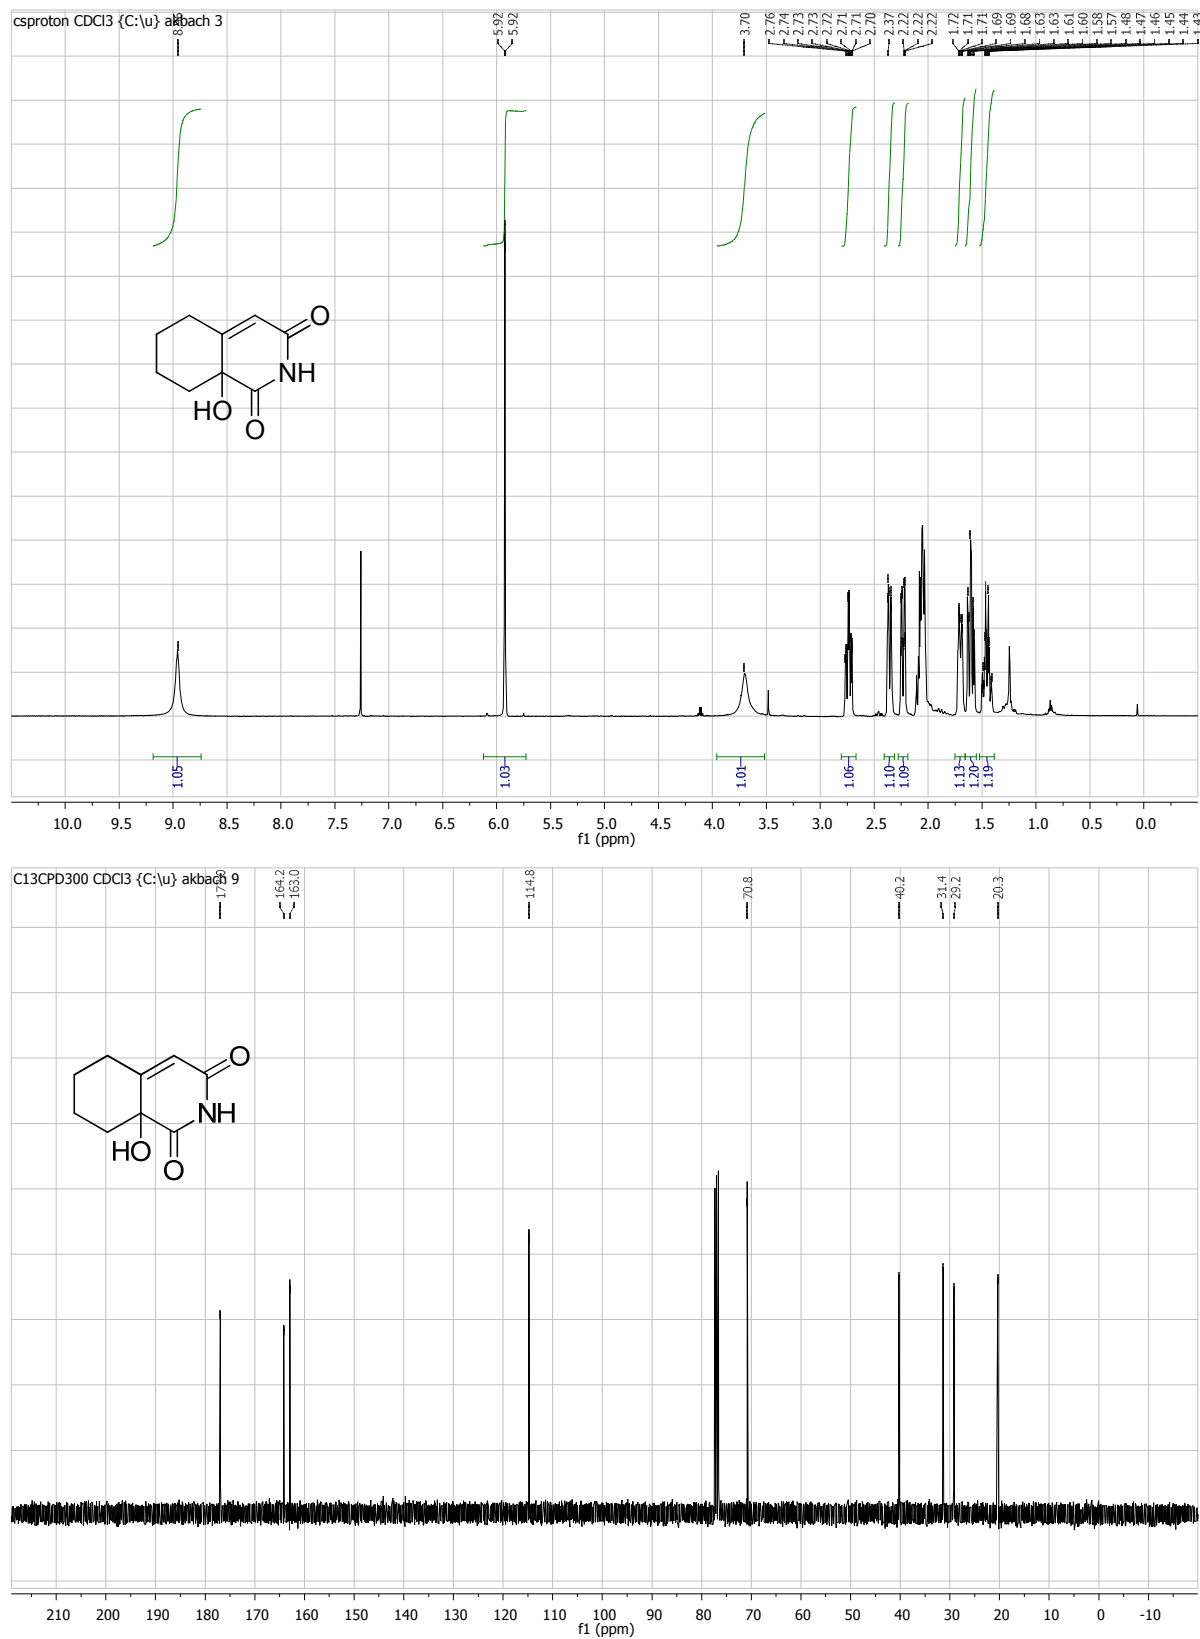

Supplement: c2cc35621j.pdf [file c2cc35621j.pdf]
